1 **Omicron reactive multi protein specific CD4 T cells defines cellular immune response induced by**  
2 **inactivated virus vaccines.**

3  
4 Joey Ming Er Lim<sup>1</sup>, Shou Kit Hang<sup>1</sup>, Smrithi Hariharaputran<sup>1</sup>, Adeline Chia<sup>1</sup>, Nicole Tan<sup>1</sup>, Eng Sing Lee<sup>2,3</sup>,  
5 Edwin Chng<sup>4</sup>, Poh Lian Lim<sup>3,5,6</sup>, Barnaby Young<sup>3,5,6</sup>, David Chien Lye<sup>3,5,6,7</sup>, Nina Le Bert<sup>1</sup>, †Antonio  
6 Bertoletti<sup>1,8</sup>, †Anthony T Tan<sup>1</sup>.

7 <sup>1</sup>Programme in Emerging Infectious Diseases, Duke-NUS Medical School, Singapore

8 <sup>2</sup>Clinical Research Unit, National Healthcare Group Polyclinics, Singapore

9 <sup>3</sup>Lee Kong Chian School of Medicine, Singapore

10 <sup>4</sup>Parkway Shenton Pte Ltd, Singapore

11 <sup>5</sup>National Center of Infectious Diseases, Singapore

12 <sup>6</sup>Department of Infectious Diseases, Tan Tock Seng Hospital, Singapore

13 <sup>7</sup>Yong Loo Lin School of Medicine, Singapore

14 <sup>8</sup>Singapore Immunology Network, A\*STAR, Singapore

15

16 †Corresponding authors

17

18

19 **Corresponding Authors and Lead Contact Information:**

20 Antonio BERTOLETTI, MD

21 Programme in Emerging Infectious Diseases

22 Duke-NUS Medical School

23 8 College Road

24 Singapore 169857

25 Singapore

26 Tel: +65 6601 2646

27 Email: [antonio@duke-nus.edu.sg](mailto:antonio@duke-nus.edu.sg)

28

29 Anthony Tanoto TAN, PhD

30 Programme in Emerging Infectious Diseases

31 Duke-NUS Medical School

32 8 College Road

33 Singapore 169857

34 Singapore

35 Email: [Anthony.tan@duke-nus.edu.sg](mailto:Anthony.tan@duke-nus.edu.sg)

36

37 **Total character count (45000 MAX with spaces)**

38 42233 (with spaces)

39

40 **Keywords**

41 COVID-19, inactivated vaccine, T cell response, adaptive immune response

1 **Summary**

2 Unlike mRNA vaccines based only on the Spike protein, inactivated SARS-CoV-2 vaccines should induce  
3 a diversified T cell response recognizing distinct structural proteins. Here we performed a comparative  
4 analysis of SARS-CoV-2 specific T cells in healthy individuals following vaccination with inactivated  
5 SARS-CoV-2 or mRNA vaccines. Relative to Spike mRNA vaccination, inactivated vaccines elicited a  
6 lower magnitude of Spike-specific T cells, but the combined Membrane, Nucleoprotein and Spike-  
7 specific T cell response was quantitatively comparable to the sole Spike T cell response induced by  
8 mRNA vaccines, and they efficiently tolerate the mutations characterizing the Omicron lineage.  
9 However, this multi-protein specific T cell response was not mediated by a coordinated CD4 and CD8  
10 T cell expansion but by selected priming of CD4 T cells. These findings can help in defining the role of  
11 CD4 and CD8 T cells in the efficacy of the different vaccines to control severe COVID-19 after Omicron  
12 infection.

13

## 1 Introduction

2 The availability of vaccines against SARS-CoV-2 have altered the landscape of the COVID-19 pandemic  
3 and allowed the virus to persist among vaccinated populations. Globally, numerous SARS-CoV-2  
4 vaccines have been developed, clinically trialled and administered till date<sup>1</sup> and vaccines based on  
5 inactivated virus (Coronavac and Sinopharm) have been utilized in almost half of the 7.3 billion doses  
6 that have been delivered to people worldwide before the end of 2021<sup>2</sup>. Despite this staggering  
7 number, a detailed analysis of cellular immune response elicited by inactivated vaccines in comparison  
8 to mRNA or adenoviral based vaccines is still lacking. The reasons for the lack of a comparative analysis  
9 of the components of the adaptive immunity responsible for killing virus-infected cells (virus-specific  
10 CD8 T cells), aiding the production of high affinity antibodies (T follicular helper T cells) and sustaining  
11 CD8 T cell function (Th1) are different<sup>3</sup>. Inactivated vaccines were utilized largely in China where  
12 Western vaccines based on mRNA or adenoviral vectors were not available for a parallel comparison,  
13 or in less wealthy nations that often lack research infrastructure to perform the complex  
14 characterization of T cell response. Furthermore, the evaluation of the efficacy of different vaccines  
15 were performed before the emergence of the antibody escaping Omicron variant<sup>1</sup>, where clinical and  
16 virological parameters, like the protection from infection or from symptomatic disease, were  
17 associated with the quantity of neutralizing antibodies<sup>4</sup>. These comparative studies showed that the  
18 quantity of neutralising antibodies stimulated by inactivated vaccines were ~10 times lower than that  
19 induced by Spike mRNA vaccines and that significant waning of the antibodies occur approximately 3  
20 months post-vaccination<sup>5-9</sup>, faster than the decline of antibodies observed with mRNA vaccines that  
21 appears to persist at high levels for at least 6 months<sup>10-16</sup>.

22

23 These antibody response comparisons are however now obsolete since the evaluation of vaccination  
24 efficacy against Omicron is now directed more towards understanding the ability of vaccines to protect  
25 from disease and not infection<sup>17</sup>. Here, T cells are likely to play a more important role in light of their  
26 ability to tolerate most of the amino acid variations present in Omicron and their ability to target virus  
27 infected cells<sup>10,18,19</sup>. In this regard, real world vaccine efficacy data showed that individuals vaccinated  
28 with inactivated virus developed in general milder disease than non-vaccinated individuals<sup>20-23</sup>.  
29 However, a direct comparative analysis of individuals vaccinated with inactivated SARS-CoV-2 and  
30 mRNA vaccines showed relatively lowered protection from infection and severe disease against Delta  
31 lineage in the former<sup>16</sup>, in line with a meta-analysis comparing the clinical efficacy of multiple COVID-  
32 19 vaccines<sup>24</sup>. These data suggest that inactivated vaccines might actually induce not only a weaker  
33 humoral response towards Spike but also an impaired level of T cell response which was however not  
34 experimentally supported. Analysis of SARS-CoV-2 specific T cells in individuals vaccinated with

1 inactivated virus demonstrated the induction of T cells specific for Spike and other structural proteins  
2 (NP and Membrane)<sup>25,26</sup> and a magnitude of vaccine-induced CD8 T cells that were superior to the  
3 Spike-specific CD8 T cells induced by mRNA vaccines<sup>26</sup>. Such strong induction of CD8 T cell response  
4 was perplexing since the antigen processing and presentation pathway associated with an exogenous  
5 protein antigen like inactivated SARS-CoV-2 vaccine is expected to induce primarily a CD4 T cell  
6 response<sup>27</sup>. Even though adjuvants can increase cross-presentation of viral antigen to CD8 T cells  
7 mediated by a specialized population of dendritic cells<sup>28</sup>, such processes should be less efficient than  
8 the direct presentation of viral antigen by MHC-class I occurring in vaccine preparations where antigen  
9 is endogenously synthesized within the cells, like in the case of mRNA based vaccines.

10

11 We therefore longitudinally analysed the vaccine-specific T cells induced in healthy individuals after  
12 SARS-CoV-2 vaccination with inactivated or mRNA vaccines and characterized their ability to recognize  
13 multiple proteins and the involvement of CD4 and CD8 T cells in such response. In addition, some of  
14 the inactivated SARS-CoV-2 vaccinees received a homologous booster within the study period of 6  
15 months. The effects of boosting on the vaccine-induced T cell response was also analysed together  
16 with the evaluation of the effects of mutations present in the Omicron VOC on the vaccine-induced T  
17 cell response against multiple viral proteins.

18

19

20

21

22

23

## 1 **Results**

### 2 **Magnitude of Spike-specific T cell response following vaccination with inactivated SARS-CoV-2** 3 **vaccines.**

4 Utilizing a pool of peptides covering the major immunodominant regions of the Spike protein (SpG  
5 pool) in a whole blood cytokine release assay (CRA) that we have previously developed and validated  
6 in mRNA vaccinated or infected individuals<sup>29</sup>, we longitudinally analysed the magnitude of Spike-  
7 specific T cell response following vaccination with inactivated SARS-CoV-2 vaccines in two cohorts  
8 (Figure 1A; Table 1). The first cohort (Inactivated cohort) are healthy individuals who received two  
9 doses of BBIBP inactivated vaccine (Sinopharm) given 21 days apart (n=30). The second cohort  
10 (Heterologous cohort) are healthy individuals who first received a single dose of Spike mRNA vaccine  
11 (Pfizer-BioNTech or Moderna) and developed adverse events that precludes the administration of the  
12 second dose of mRNA vaccine. After the normalisation of the adverse events (1-6 months after  
13 occurrence of adverse events), these individuals received two doses of CoronaVac inactivated vaccine  
14 (Sinovac) given 21 days apart (n=20). A reference cohort (mRNA cohort) of healthy individuals who  
15 received two doses of Spike mRNA vaccine (Pfizer-BioNTech or Moderna) were also analysed with the  
16 whole blood CRA (n=79).

17

18 A single dose of inactivated vaccine induced an increase in Spike-induced IFN- $\gamma$  and/or IL-2 in all  
19 individuals of the Inactivated cohort 21 days post-vaccination (Figure 1B). In the Heterologous cohort,  
20 Spike induced cytokine responses were already present before receiving inactivated vaccines due to  
21 the prior dose of Spike mRNA vaccine, and the response remained high after inactivated SARS-CoV-2  
22 vaccination (Figure 1B). The level of cytokines induced by the Spike peptide pool remained stable for  
23 up to 2-3 months post-vaccination (1-2 months after receiving the second dose) in both cohorts  
24 (Figure 1B). Even with the initial priming from mRNA vaccines prior to inactivated SARS-CoV-2  
25 boosting, the peak magnitude of the Spike-induced cytokines detected in the Heterologous cohort do  
26 not differ from the reference mRNA cohort (Figure 1B and 1C).

27

28 While the response kinetics appear similar between the Inactivated and mRNA cohorts, with peaks of  
29 Spike-induced IFN- $\gamma$  and IL-2 observed 21 days post-vaccination, the magnitude of the Spike-induced  
30 response was lower in individuals who received inactivated vaccines than compared to those who had  
31 Spike mRNA vaccination (Figure 1B and 1C). This difference was particularly significant 2-3 months  
32 post-vaccination (Figure 1C). Even in the Heterologous cohort where individuals were primed with  
33 Spike mRNA vaccine before boosting with inactivated vaccines, the magnitude of the Spike-induced T  
34 cell cytokines was lower but did not reach statistical significance (Figure 1C). Analysis of the quantities

1 of IFN- $\gamma$  and IL-2 secreted after SpG peptide pool stimulation did not show significant differences  
2 between all 3 cohorts at 21 days or 2-3 months post-vaccination (Figure 1D).

3

4 These results shows that inactivated SARS-CoV-2 vaccines induced a quantitatively lower Spike-  
5 specific T cell response with minimal differences in the balance of IFN- $\gamma$  and IL-2 secreted in  
6 comparison to mRNA vaccines. Consistent with what was observed previously<sup>29</sup>, quantifying the Spike  
7 T cell response through IL-2 secretion also appears more robust with less variability than by IFN- $\gamma$   
8 secretion (Figure 1).

9

#### 10 **Immunodominance of Spike-specific T cells induced by inactivated SARS-CoV-2 vaccines**

11 To understand the breadth of the Spike-specific T cell response induced by inactivated SARS-CoV-2  
12 vaccines, we also performed the whole blood CRA assay using 7 overlapping peptide pools that spans  
13 the entire Spike protein on blood collected 2-3 months after receiving inactivated or mRNA vaccines.  
14 A schematic representation of the localization of peptide pools 1 to 7 in relation to the S1 (N-terminal),  
15 RBD and S2 (C-terminal) regions of Spike is displayed in Figure 2A. Randomly selected individuals from  
16 the Inactivated (n=5) and Heterologous (n=8) cohorts were analysed and we detected Spike T cell  
17 responses in all individuals (Figure 2B). Almost all of the tested individuals had dominant Spike-specific  
18 T cell response targeting the S2 chain of the Spike protein (Spike pool 5-7) (Figure 2B and 2C), with the  
19 strongest response targeting pool 6 that covers amino acid 886-1085 of the Spike protein. There were  
20 no observable differences between the cohorts and this immunodominance pattern is similar to that  
21 observed in a previous study on mRNA vaccinated individuals (Figure 2B, mRNA n=6) where majority  
22 of the Spike-specific T cells were targeting epitopes present in the S2 chain of Spike<sup>29</sup>.

23

#### 24 **Inactivated vaccine-induced T cell responses targeting multiple viral structural proteins**

25 The breadth of inactivated SARS-CoV-2 vaccine-induced T cell response should extend beyond the  
26 Spike protein since the inactivated vaccine contains other structural proteins in addition to Spike<sup>30,31</sup>.  
27 Similar to the analysis of Spike-specific T cell response, we used overlapping peptides covering the  
28 entire Membrane and Nucleoprotein in a whole blood CRA. We observed induction of Membrane-  
29 (Figure 3A) and Nucleoprotein-specific (Figure 3B) T cell response in both cohorts. Over 90% of the  
30 individuals in both cohorts had detectable Membrane- and Nucleoprotein-specific T cell response 21  
31 days after vaccination, and the response persisted for at least 2-3 months post-vaccination (Figure 3A  
32 and 3B). Secretion of IL-2 was again more robust with less variability among the individuals.  
33 Importantly, the magnitude of the Spike T cell response was positively correlated with both the  
34 Membrane and Nucleoprotein T cell response (Figure 3C), demonstrating that these responses were

1 indeed induced and associated with inactivated SARS-CoV-2 vaccination. Comparative analysis of the  
2 cytokine quantity induced by Spike, Membrane and Nucleoprotein peptide pools 2-3 months post-  
3 vaccination, showed that the majority of the vaccine induced T cell response were targeting the Spike  
4 protein, followed by Nucleoprotein and Membrane, a hierarchy proportional to the size of the  
5 respective proteins (Figure 3D).

6

7 We also measured the global level of T cell response induced by inactivated SARS-CoV-2 and Spike  
8 mRNA vaccines. The amount of IFN- $\gamma$  or IL-2 secreted after stimulation with SpG, Membrane and  
9 Nucleoprotein peptide pools in both inactivated (n=27) and Heterologous (n=18) vaccinated cohorts  
10 were comparable to the one detected by SpG only in mRNA vaccine recipients (n=79) (Figure 4).

11

### 12 **Phenotype of vaccine-induced T cell responses against multiple viral proteins**

13 We next sought to determine whether the inactivated vaccine-induced T cell response were mediated  
14 by helper CD4+ or cytotoxic CD8+ T cells. Two different methods were used: a classical analysis of  
15 upregulation of T cell activation markers (AIM) on the CD4 (CD25+ OX40+ 41BB+) and CD8 (CD69+  
16 41BB+) T cell subsets after PBMC stimulation with peptide megapools, or a depletion approach where  
17 CD8 and CD4 T cells were removed from the PBMC before stimulation with the peptide indicated  
18 megapools in an IFN- $\gamma$  ELISPOT assay (Figure 5A).

19

20 The two methods yielded completely different results in terms of the composition of the peptide pools  
21 responsive T cells. A significant upregulation of AIM on both CD4 and CD8 T cells upon Spike  
22 stimulation was detected in all tested individuals from both Inactivated and mRNA cohorts (Figure 5C  
23 and D). In contrast, using the depletion approach, we observed a clear CD4 centric Spike T cell  
24 response induced by inactivated vaccines (Figure 5B). Spike-specific CD8 T cells were only observed  
25 at very low quantities in 2 out of 12 individuals vaccinated with inactivated SARS-CoV-2, in contrast to  
26 the Spike-specific CD4 T cells that were present in all individuals tested (Figure 5B). In addition, T cells  
27 specific for Nucleoprotein and Membrane were also CD4 centric with no detectable response in the  
28 CD8 enriched samples (Supplementary Figure 3). On the other hand, both CD4 and CD8 Spike-specific  
29 T cells were induced by mRNA vaccines (Figure 5B).

30

### 31 **Effects of inactivated SARS-CoV-2 vaccine booster (third dose) on the T cell response**

32 Studies that follows individuals who received primary vaccination (2 doses) with inactivated SARS-  
33 CoV-2 vaccines have reported a progressive waning of neutralizing antibody at 3 months with titres  
34 almost reaching pre-vaccination levels at ~6 months<sup>6-8</sup>. This has prompted policy changes in Singapore

1 to recommend the inclusion of a third dose of inactivated SARS-CoV-2 into the primary vaccination  
2 series 3 months after the administration of the second dose. While the additional dose of inactivated  
3 SARS-CoV-2 vaccine have been shown to effectively recall the neutralizing antibody titres that have  
4 declined substantially after the second dose<sup>7</sup>, little is known about its effects on the amplification of  
5 vaccine-induced T cell responses. As such, we compared the vaccine-induced T cell response before  
6 and after the third vaccine dose in the Inactivated and Heterologous cohorts using the whole blood  
7 CRA with SpG, Membrane and Nucleoprotein peptide pools.

8

9 In the cohorts studied, a total of 18 individuals in the Inactivated cohort and 7 in the Heterologous  
10 cohort were given the third vaccine dose 1-3 months and <1 month before blood collection at ~6-7  
11 months after the first vaccination dose respectively (Figure 6A). 3 individuals in the Inactivated cohort  
12 and 11 in the Heterologous cohort have not received the third dose of vaccine at the time of blood  
13 collection and they were analysed as controls. None of the vaccinated individuals analyzed had a  
14 known history of SARS-CoV-2 infection up until the last blood sample collection at ~6-7 months from  
15 the first vaccination dose.

16

17 From the whole blood CRA, we did not observe an appreciable change in the amount of secreted IFN-  
18  $\gamma$  and IL-2 after SpG peptide pool stimulation of whole blood samples collected before (~1-2 months  
19 after the 2<sup>nd</sup> dose) and after (either 1-3 months or <1 month after the 3<sup>rd</sup> dose) the third dose of  
20 inactivated SARS-CoV-2 vaccine in both Inactivated and Heterologous cohorts (Figure 6B). The  
21 response towards Membrane and Nucleoprotein also remained unchanged before and after the third  
22 vaccination dose (Figure 6C). Importantly, the magnitude of the whole blood CRA response against all  
23 peptide pools tested did not differ between the individuals in either cohorts who received the third  
24 inactivated vaccine dose and the controls who did not (Figure 6B and C).

25

26 Thus, the third dose of inactivated SARS-CoV-2 vaccine did not effectively induce a significant boost of  
27 the vaccine-induced T cell response stimulated by the first two inactivated vaccine doses. Unlike the  
28 neutralizing antibody titres that wanes within 3-6 months of the second dose<sup>6-8</sup>, the inactivated  
29 vaccine-induced T cell response was maintained for at least 6 months without observable waning  
30 (Figure 6B and C).

31

32 **Inactivated vaccine-induced T cell responses are largely preserved against the Omicron variant of**  
33 **concern**



1 Given that the Omicron variant of concern (VOC) is the prevailing SARS-CoV-2 lineage circulating  
2 globally, we determined whether the inactivated vaccine-induced T cell responses can recognise the  
3 Omicron VOC proteins. We designed 3 sets of peptide pools specific for the Spike, Membrane and  
4 Nucleoprotein respectively (Supplementary Table 1). Each set consist of a megapool made up of  
5 overlapping peptides spanning the entire vaccine-derived protein, a WT pool containing peptides  
6 covering the regions affected by mutations present in the Omicron variant of the protein, and a MT  
7 pool consisting of peptides from the WT Pool with the amino acid mutations present in the Omicron  
8 variant of the protein (Figure 7A). These peptide pools were used in the whole blood CRA using  
9 samples collected from individuals in the Inactivated and Heterologous cohorts ~6-7 months after  
10 their first inactivated vaccine dose. Only individuals who received the third inactivated vaccine dose  
11 were analysed to ensure that the vaccine-induced T cell response was at its optimum.

12

13 We observed a wide heterogeneity in the ability of inactivated vaccine-induced T cell response to  
14 recognise the Spike and Membrane proteins from the Omicron VOC, which ranges from the complete  
15 abrogation to a gain of function exceeding the response towards the corresponding vaccine-derived  
16 proteins (Figure 7B). Based on the amount of IFN- $\gamma$  secreted in the whole blood CRA, 13/18 individuals  
17 from the Inactivated cohort and 6/7 individuals from the Heterologous cohort have at least 50% of  
18 their Spike-specific T cell response preserved against the Omicron Spike protein (Figure 7B). For the  
19 Membrane-specific T cell response, at least 50% of the response was maintained in 10/18 individuals  
20 from the Inactivated cohort and 2/7 individuals in the Heterologous cohort (Figure 7B). Interestingly,  
21 almost all of the Nucleoprotein-specific T cell response was preserved with no individual exhibiting  
22 lower than 80% of response against the Omicron Nucleoprotein (Figure 7B). This is in stark contrast  
23 to the Membrane-specific T cell response even though both proteins have similar number of  
24 mutations present in the Omicron VOC (Supplementary Table 1).

25

26 Combining the T cell response against multiple proteins, majority of the vaccinees still maintained  
27 their response towards the Omicron VOC (Figure 7C). Importantly, in vaccinees where the singular  
28 Spike-specific T cell response was significantly inhibited, the combined multi-antigenic T cell response  
29 showed better preservation against Omicron (Figure 7C). Similar observations were made when the  
30 amount of secreted IL-2 was analysed (Figure 7B and C).

31

32

33

## 1 **Discussion**

2 The virological landscape of the COVID-19 pandemic was radically modified by the emergence of new  
3 SARS-CoV-2 lineages able to escape the neutralizing ability of antibodies elicited by vaccines based on  
4 the Spike protein of the ancestor Wuhan isolates<sup>32,33</sup>. This necessitates a more comprehensive analysis  
5 of vaccine immunogenicity that could not only be based on antibody measurements but also requires  
6 an evaluation of cellular immunity<sup>17</sup>. T cells are not playing a role in the prevention of infection but  
7 can be extremely important in the control of the viral pathogenesis due to their ability to recognize  
8 and lyse virus-infected cells and their association with viral control in acutely infected patients<sup>34</sup>. For  
9 this reason, we performed a detailed characterization of the cellular immunity specific for different  
10 SARS-CoV-2 proteins elicited by inactivated virus vaccines and mRNA vaccines in a population of  
11 healthy adult individuals.

12

13 Using a whole blood CRA<sup>29</sup> that measures the ability of T cells to secrete cytokines directly in whole  
14 blood after encounter with specific antigens, we observed that the quantity of Spike peptide-  
15 stimulated T cell cytokines were lower in vaccinees who received inactivated vaccines in comparison  
16 to those who had Spike mRNA vaccines. However, both vaccine preparations induced a Th1 response  
17 with similar IFN- $\gamma$  and IL-2 secretion profile. Both vaccines also elicit a comparable Spike  
18 immunodominance hierarchy focused more on the S2 region of Spike. (Figure 1 and 2). On the other  
19 hand, inactivated vaccines do not elicit a response only focused on the Spike protein. Significant  
20 quantities of Membrane and Nucleoprotein specific T cells were also induced after vaccination that  
21 are clearly absent in individuals vaccinated with mRNA vaccines (Figure 3). A comparison of the multi-  
22 antigenic vaccine-induced T cell response calculated by quantifying the levels of IFN- $\gamma$  and IL-2 elicited  
23 by inactivated versus mRNA vaccines showed that inactivated vaccines not only elicited a broader T  
24 cell immunity but they also induce a quantitatively comparable T cell response against SARS-CoV-2  
25 relative to mRNA vaccines (Figure 4).

26

27 The importance of eliciting a multi-antigenic T cell response against different SARS-CoV-2 proteins  
28 should not be underestimated since T cell response in individuals who control SARS-CoV-2 with limited  
29 or no symptoms possess T cell responses against different epitopes present in different structural and  
30 non-structural proteins<sup>34-38</sup>. In addition, in experimental SARS-CoV-2 challenge of non-human  
31 primates and mice vaccinated against Nucleoprotein<sup>39,40</sup> or Envelope and Membrane<sup>41</sup>, the vaccinated  
32 animals had less severe pathology and lower viral loads. This protective effect was associated with  
33 the rapid recall of antigen-specific T cell responses without robust humoral immune response,  
34 showing the protective capacity of T cells specific for other structural proteins of SARS-CoV-2<sup>39-41</sup>. The

1 broad specificity is also potentially beneficial when considering the effects of amino acid mutations  
2 present in the different SARS-CoV-2 proteins of known VOCs. While the inactivated SARS-CoV-2  
3 vaccine induced T cell response was largely preserved against the Omicron VOC, there were  
4 differences in the responses against different structural proteins (Figure 7). In all vaccinees tested,  
5 Nucleoprotein-specific T cell responses were not affected by the mutations present in Omicron, while  
6 both Spike and Membrane specific T cell responses were inhibited to various levels (Figure 7). This is  
7 likely explained by the density of amino acid mutations present in each protein (Spike: 1 mutation in  
8 40 amino acids; Membrane:1 in 67; Nucleoprotein: 1 in 80). A protein with a low density of amino  
9 acid mutation is more likely to contain T cell epitopes that are fully conserved between the vaccine  
10 strain and Omicron. Importantly, in vaccinees where their Spike-specific T cell response was  
11 significantly inhibited by the mutations present in Omicron, their combined vaccine-induced T cell  
12 response (Spike, Membrane and Nucleoprotein) was better preserved against Omicron (Figure 7C).  
13 The presence of multi-protein specific T cells in individuals vaccinated with inactivated virus can  
14 therefore provide them with a population of memory T cells more likely to tolerate the frequently  
15 found amino acid substitutions in Spike which can partially suppress the Spike-specific T cell response  
16 elicited by current Spike mRNA vaccines<sup>42-48</sup>. While the ability of Omicron to escape the full repertoire  
17 of Spike-specific T cells induced by mRNA vaccines occurs only in a minority of individuals (10-15%),  
18 immune escape can be substantial in particular for Spike-specific CD8 T cells<sup>48</sup>.

19

20 However, the potential advantages of the heterogenous specificity of T cells generated by inactivated  
21 SARS-CoV-2 vaccination needs to be balanced by our observation that inactivated vaccines do not  
22 elicit any CD8 T cell response against any viral proteins. The robust vaccine-induced T cell response  
23 was exclusively mediated in inactivated vaccine recipients by CD4 T cells. In contrast, individuals  
24 vaccinated with mRNA and non-replicating adenoviral vectored Spike vaccines are capable of inducing  
25 both CD4 and CD8 T cell responses as shown previously<sup>10,49-51</sup>, and by our own data. Our results are  
26 in contrast with previous observations by other groups that showed the ability of inactivated vaccines  
27 to induce both CD4 and CD8 T cell response but are however in line with other data of T cell response  
28 observed in other inactivated viral vaccines<sup>52,53</sup>. The difference appears to be due to the different  
29 method of analysis utilized by us and by the group in Hong-Kong<sup>26</sup>. The AIM assay utilized by them  
30 and by many groups worldwide (including us<sup>29,42,54</sup>) is a powerful cellular technique that can define the  
31 phenotype of peptide responsive T cells. It is equally well known that robust cytokine response of  
32 peptide responsive T cells can also activate other T cells in the vicinity in a bystander fashion without  
33 T cell receptor/epitope engagement<sup>55-57</sup>. From our comparative analysis of results obtained by AIM  
34 and by depleting CD4 and CD8 T cells, it seems clear that a robust activation of CD8 T cells was

1 observed in inactivated vaccine recipients only with the AIM assay, showing that the results derived  
2 from the AIM assay can be confounded, at least in vaccine recipients by robust bystander activation.

3

4 The combined impact of the multi-protein specific T cell response and its association with a deficiency  
5 of CD8 T cell induction on the protection from disease development is difficult to be measured. In  
6 SARS-CoV-2 convalescent rhesus macaques with sub-protective antibody titres, depletion of CD8 T  
7 cells partially abrogated the protective efficacy of natural immunity against viral challenge, showing  
8 the anti-SARS-CoV-2 effects mediated directly by CD8 T cells<sup>58</sup>. At the same time, the induction of CD4  
9 T cells specific for the nucleoprotein of SARS-CoV in the nasal cavity of mice protected the animal from  
10 lethal disease after infection with different Coronaviruses<sup>59</sup>. This protective effect was mediated  
11 through the secretion of IFN- $\gamma$  and importantly, through the subsequent recruitment of virus-specific  
12 CD8 T cells<sup>59</sup>. Similarly, memory CD4 T cells also directly and indirectly mediate protective effects in  
13 Influenza A virus infected mice<sup>3</sup>. Clinical analysis of the efficacy of inactivated vaccines in different  
14 populations before the emergence of Omicron have shown that inactivated virus vaccines provided  
15 protection against the development of severe COVID-19<sup>20-23</sup> but with lower rates than the one  
16 provided by mRNA vaccines. On the contrary, recent data from Hong-Kong measuring the efficacy  
17 against mild and severe COVID-19 development in healthy adults infected with Omicron showed  
18 similar efficacy of the two vaccine preparations after three doses<sup>60</sup>. Perhaps the lack of the  
19 coordinated activation of CD4 and CD8 T cells observed in inactivated virus vaccine recipients infected  
20 with Wuhan or Delta strains of SARS-CoV-2 was then compensated by the protein multi-specificity  
21 that better tolerate the mutations present in Omicron.

22

23 Finally, our work showed that boosting with the third dose of inactivated SARS-CoV-2 vaccine 3  
24 months after the second dose did not modify the Spike, Membrane or Nucleoprotein T cell response  
25 (Figure 5). The magnitude of the T cell response against the 3 different proteins were even comparable  
26 to individuals who completed their primary vaccination 6 months before and did not receive their  
27 booster vaccines within the study period. Our data are in line with what was observed in a phase 2  
28 placebo-controlled trial of inactivated SARS-CoV-2 vaccine: the third dose of inactivated vaccine 2  
29 months after completion of the primary vaccination course (2 doses) only modestly increased the  
30 neutralising antibody levels<sup>7</sup>. It is plausible that the ineffective boosting is due to the neutralisation  
31 of the administered inactivated SARS-CoV-2 by the antibodies generated from the primary vaccination  
32 course leading to a decline in antigen availability to stimulate the immune system. This hypothesis  
33 was supported by the observation in the same phase 2 clinical trial where the neutralising antibody  
34 titres were significantly boosted and were 3-4 fold higher when the administration of the third vaccine

1 dose was delayed till 8 months (instead of 2 months) after completion of the primary vaccination<sup>7</sup>. It  
2 was also observed that humoral and T cell response were both robustly induced when the booster  
3 inactivated SARS-CoV-2 vaccine was given 5 months after the primary vaccination<sup>61</sup>. These results  
4 certainly calls for the future evaluation of the immunogenicity of inactivated SARS-CoV-2 vaccine in a  
5 setting where interference from existing virus-specific immune responses can occur.

6

7 In conclusion, we present here a detailed functional and quantitative evaluation of the T cell response  
8 induced by inactivated virus vaccines in comparison to mRNA vaccines. We show that in sharp  
9 contrast to the clear inferiority of the humoral immunogenicity, inactivated vaccines elicit a T cell  
10 response of comparable magnitude and superior breath, relative to the mRNA vaccines, that persisted  
11 for at least 6 months without need of further boosting. The ability to recognize different SARS-CoV-2  
12 proteins, in particular Membrane and NP, allowed the T cell response induced by inactivated vaccines  
13 to better tolerate the mutations present in Omicron compared to the Spike-focused mRNA vaccine  
14 induced T cells. However, the robust SARS-CoV-2 T cell response was exclusively mediated by CD4 T  
15 cells while CD8 T cell were not induced. Recent clinical data of vaccine efficacy in a large population  
16 suggested that the theoretical defect caused by the biased induction of a single component of cellular  
17 immunity by the inactivated vaccine could be balanced by the superior ability to tolerate amino acid  
18 mutations present in Omicron. Such data will have to be analysed in a large clinical study where T cell  
19 responses will be measured and will help to clarify the impact of virus-specific CD4 or CD8 T cells in  
20 SARS-CoV-2 pathogenesis.

21

22

23

24

1    **Acknowledgments**

2    We would like to thank all clinical and nursing staff who provided care for the patients; all clinical trial  
3    coordinators and staff for their invaluable assistance in coordinating patient recruitment.

4

5    **Author contributions**

6    A.T. Tan, N. Le Bert and A. Bertoletti designed the experiments; J.M.E. Lim, S.K. Hang, S.  
7    Hariharaputran, A. Chia, and N. Tan performed the experiments; A.T. Tan, N. Le Bert and A. Bertoletti  
8    analyzed and interpreted all the data; A.T. Tan prepared the figures and wrote the paper; A.T. Tan, N.  
9    Le Bert, P. L. Lim, B. Young, D.C. Lye and A. Bertoletti reviewed and edited the manuscript; E. S. Lee,  
10   E. Chng, P. L. Lim, B. Young and D.C. Lye designed the clinical trial, recruited all the patients and  
11   provided the clinical samples; A.T. Tan, N. Le Bert and A. Bertoletti designed and coordinated the  
12   study.

13

14   **Declaration of interest**

15   A.T. Tan, N. Le Bert and A. Bertoletti reported a patent for a method to monitor SARS-CoV-2-specific  
16   T cells in biological samples pending. The other authors have declared that no conflict of interest  
17   exists.

18

19   **Funding source**

20   This study is supported by the Singapore Ministry of Health's National Medical Research Council under  
21   its COVID-19 Research Fund (COVID19RF3-0060, COVID19RF-001 and COVID19RF-008).

22

1 **Figure Legends**

2 **Figure 1. Lower quantities of Spike-specific T cells were induced following vaccination with**  
3 **inactivated SARS-CoV-2 compared to Spike mRNA vaccines.** A) Schematic showing the different  
4 groups of vaccinated individuals studied and the time points where SARS-CoV-2 specific T cells were  
5 analysed. Healthy individuals were given two infusions of either inactivated SARS-CoV-2 vaccines  
6 (Inactivated: n=30) or Spike mRNA vaccines (mRNA: n=79) spaced 21 days apart. In the third group  
7 (Heterologous: n=20), healthy individuals were first given a single infusion of Spike mRNA vaccine,  
8 followed by two infusions of inactivated SARS-CoV-2 vaccine spaced 21 days apart due to the  
9 development of significant adverse events following mRNA vaccination. Blood collected at the  
10 indicated time points were used to quantify SARS-CoV-2 specific T cells. B) Longitudinal IFN- $\gamma$  and IL-  
11 2 concentrations detected through whole blood CRA after stimulation with SpG peptide pool. Grey  
12 shaded areas denote the positivity cut-off for the measured cytokines. Pie charts shows the  
13 proportion of individuals with detectable SpG-reactive T cells at the different time points. C) Cross-  
14 sectional comparison of median IFN- $\gamma$  and IL-2 concentrations detected through whole blood CRA  
15 after stimulation with SpG peptide pool. Differences were analysed with Kruskal-Wallis test and  
16 multiple comparisons were adjusted with Dunn's multiple comparison test. Only significant adjusted  
17 P values are shown (\*\*\*\*:  $P \leq 0.0001$ ; \*\*\*:  $P \leq 0.001$ ; \*\*:  $P \leq 0.01$ ; \*:  $P \leq 0.05$ ). D) Dot plots shows the IFN-  
18  $\gamma$  and IL-2 concentrations detected through whole blood CRA after stimulation with SpG peptide pool  
19 at the indicated time points. Each dot denotes a single individual. Individuals in the Inactivated cohort  
20 (red dots) and the Heterologous cohort (green dots) were overlaid on the vaccinees from the mRNA  
21 cohort (blue dots). A dashed line of identity was added for reference.

22

23 **Figure 2. Inactivated SARS-CoV-2 vaccine-induced Spike-specific T cells targets the S2 chain of the**  
24 **spike protein.** A) Schematic representation of the 7 Spike-specific peptide pools containing 15-mer  
25 overlapping peptides spanning the entire Spike protein. Pools 1-4 contain peptides from the signal  
26 peptide and the S1 chain while pools 5-6 encompass the S2 chain together with the transmembrane  
27 and cytoplasmic domains. B) The amount of IFN- $\gamma$  and IL-2 secreted in the whole blood CRA in  
28 response to overlapping peptides covering the entire Spike protein (total Spike-specific T cell  
29 response) of all vaccinees 2-3 months after receiving inactivated (Inactivated: n=5; Heterologous: n=8)  
30 or mRNA vaccines (mRNA: n=6) are shown in the blue heatmap. The red heatmap denotes the  
31 proportion of Spike-specific T cell responses of each vaccinee targeting the different parts of the Spike  
32 protein. C) Bars shows the median proportion of Spike-specific T cell responses targeting the different  
33 parts of the Spike protein as assayed through IFN- $\gamma$  and IL-2 whole blood CRA in the vaccinees from  
34 the Inactivated (circles) and Heterologous (triangles) cohorts. Differences were analysed with Kruskal-

1 Wallis test and multiple comparisons were adjusted with Dunn's multiple comparison test. Only  
2 significant adjusted P values are shown (\*\*\*\*:  $P \leq 0.0001$ ; \*\*\*:  $P \leq 0.001$ ; \*\*:  $P \leq 0.01$ ; \*:  $P \leq 0.05$ ).

3

4 **Figure 3. T cell responses targeting Membrane and Nucleoprotein were expanded following**  
5 **vaccination with inactivated SARS-CoV-2.** Longitudinal IFN- $\gamma$  and IL-2 concentrations detected  
6 through whole blood CRA of all vaccinees receiving inactivated SARS-CoV-2 vaccines (Inactivated:  
7 n=30; Heterologous: n=20) after stimulation with overlapping peptides covering the entire Membrane  
8 (A) and Nucleoprotein (B). Grey shaded areas denote the positivity cut-off for the measured cytokines.  
9 Pie charts shows the proportion of individuals with detectable M- or NP- reactive T cells at the  
10 different time points. C) Linear regression analysis of the T cell response against SpG peptide pool and  
11 the Membrane (blue) or Nucleoprotein (red) as evaluated by the quantification of IFN- $\gamma$  (top) or IL-2  
12 (bottom) in peptide stimulated whole blood from vaccinees (Inactivated: n=30; Heterologous: n=20)  
13 at all analysed time points. Dotted lines denote the 95% confidence interval. D) Total Spike-,  
14 Membrane- and Nucleoprotein-specific T cell response detected through whole blood CRA (IFN- $\gamma$ : top  
15 or IL-2: bottom) of all vaccinees 2-3 months after receiving inactivated vaccines (Inactivated: n=28;  
16 Heterologous: n=20). Bar graph insert shows the size (amino acid) of the indicated proteins.  
17 Differences were analysed with Kruskal-Wallis test and multiple comparisons were adjusted with  
18 Dunn's multiple comparison test. Only significant adjusted P values are shown (\*\*\*\*:  $P \leq 0.0001$ ; \*\*\*:  
19  $P \leq 0.001$ ; \*\*:  $P \leq 0.01$ ; \*:  $P \leq 0.05$ ).

20

21 **Figure 4. Total T cell response induced by inactivated SARS-CoV-2 and mRNA vaccines are**  
22 **comparable.** Total vaccine-specific T cell response (Spike only for mRNA vaccine; Spike, Membrane  
23 and Nucleoprotein for inactivated vaccines) detected through whole blood CRA (IFN- $\gamma$ : left or IL-2:  
24 right) of vaccinees 2-3 months after receiving the respective vaccines (mRNA: n=79; Inactivated: n=27;  
25 Heterologous: n=18). Spike-specific T cell response were evaluated by stimulation with SpG peptide  
26 pool, while overlapping peptide megapools covering the entire Membrane or Nucleoprotein were  
27 used to quantify the respective protein-specific T cell response. Dotted lines denote the lower limit  
28 of quantification (LLOD) for each of the measured cytokine. Differences were analysed with Kruskal-  
29 Wallis test and multiple comparisons were adjusted with Dunn's multiple comparison test. Only  
30 significant adjusted P values are shown (\*\*\*\*:  $P \leq 0.0001$ ; \*\*\*:  $P \leq 0.001$ ; \*\*:  $P \leq 0.01$ ; \*:  $P \leq 0.05$ ).

31

32 **Figure 5. Inactivated SARS-CoV-2 vaccines stimulates primarily CD4 T-cell responses.** A) Schematic  
33 illustrates the analysis of SARS-CoV-2 specific CD4 and CD8 T cells by IFN- $\gamma$  ELISPOT and by the  
34 detection of activation markers on CD4 (CD25+ OX40+ 41BB+) and CD8 (CD69+ 41BB+) T cells. PBMCs



1 collected from the 3 cohorts of vaccinees 2-3 months after vaccination (Inactivated: n=6; mRNA: n=6;  
2 Heterologous: n=6) were either depleted of CD8 or CD4 T cells through negative selection before  
3 stimulation with overlapping peptides covering the entire Spike for ELISPOT. Total PBMCs were also  
4 analysed as a control. For the AIM assay, total PBMCs were stimulated with overlapping peptides  
5 covering the entire Spike protein for 24 hours before flow cytometry analysis. B) Bars denote the IFN-  
6  $\gamma$  SFU quantified for each vaccinee after stimulating CD4-enriched (green), CD8 enriched (blue) or total  
7 PBMCs (grey) with Spike overlapping peptides. Representative ELISPOT well images of the respective  
8 peptide stimulated cell populations are shown. C) Flow cytometry analysis of activation marker  
9 expression on CD4 and CD8 T cells from individuals in the Inactivated (n=6) and mRNA (n=6) cohort  
10 before and after stimulation with overlapping peptides covering the entire Spike protein. Differences  
11 were analysed with paired t-test and only significant P values are shown (\*\*\*\*:  $P \leq 0.0001$ ; \*\*\*:  
12  $P \leq 0.001$ ; \*\*:  $P \leq 0.01$ ; \*:  $P \leq 0.05$ ). D) Flow cytometry dot plots of CD4 and CD8 T cells from  
13 representative individuals before and after Spike peptide stimulation are shown together with the  
14 corresponding AIM+ frequencies among the total CD4 or CD8 T cells.

15

16 **Figure 6. Vaccine induced T cell responses were not boosted upon the third inactivated vaccine dose.**

17 A) Schematic showing the time points where a third dose of inactivated vaccine was given to  
18 individuals in the Inactivated (n=18/30 boosted) and Heterologous (n=7/20 boosted) cohorts. Blood  
19 was collected ~6-7 months after the first dose of inactivated vaccines, which corresponds to 1-3  
20 months and <1 month after the booster dose for individuals in the Inactivated cohort and  
21 Heterologous cohort respectively. SARS-CoV-2 specific T cells after the booster dose were quantified  
22 as described previously (Figure 1 and 3) through whole blood CRA after stimulation with SpG,  
23 Membrane and Nucleoprotein peptide pools. Individuals who did not received the booster dose were  
24 analysed as controls. B) Longitudinal IFN- $\gamma$  and IL-2 concentrations detected through whole blood CRA  
25 after stimulation with SpG peptide pool in individuals before and after receiving the booster dose.  
26 Grey shaded areas denote the positivity cut-off for the measured cytokines. C) Graph shows the  
27 change in IFN- $\gamma$  and IL-2 concentrations detected through whole blood CRA after stimulation with SpG,  
28 Membrane and Nucleoprotein peptide pools before and after the booster dose (V4-V3  
29 concentrations) in individuals from the Inactivated and Heterologous cohorts. Differences were  
30 analysed with Kruskal-Wallis test and multiple comparisons were adjusted with Dunn's multiple  
31 comparison test. Only significant adjusted P values are shown (\*\*\*\*:  $P \leq 0.0001$ ; \*\*\*:  $P \leq 0.001$ ; \*\*:  
32  $P \leq 0.01$ ; \*:  $P \leq 0.05$ ).

33

1 **Figure 7. Inactivated SARS-CoV-2 vaccine-induced T cell response against the Omicron variant of**  
2 **concern.** A) Schematic showing the concept behind the design of the peptide pools to assess the  
3 inactivated SARS-CoV-2 vaccine-induced T cell response against the Spike, Membrane and  
4 Nucleoprotein from the Omicron variant of concern. Orange regions refers to amino acid mutations  
5 present in the Omicron variant relative to the vaccine-derived SARS-CoV-2. The respective Megapool  
6 contains peptides covering the whole wildtype SARS-CoV-2 protein (Spike, Membrane or  
7 Nucleoprotein). The respective WT Pool contains peptides, with the wildtype amino acid sequence,  
8 covering the regions affected by mutations present in the Omicron variant of the protein. The  
9 respective MT Pool contains peptides from the WT Pool with the amino acid mutations present in the  
10 Omicron variant. The equation shows how the percentage preservation of the vaccine-induced T cell  
11 response against the Spike, Membrane or Nucleoprotein from the Omicron variant of concern was  
12 calculated. B) Inactivated SARS-CoV-2 vaccine-induced T cell response of individuals from the  
13 Inactivated (n=18; dark blue) and Heterologous (n=7; light blue) cohorts were evaluated by whole  
14 blood CRA using the peptide pools described in A. The percentage preservation of the vaccine-induced  
15 T cell response against the Spike, Membrane and Nucleoprotein from the Omicron variant of concern  
16 were calculated using IFN- $\gamma$  (top) or IL-2 (bottom) concentrations from whole blood CRA and displayed  
17 as bars. Bars that enter the green shaded areas refers to a gain of function response against the  
18 Omicron variant of concern. C) The percentage preservation of the Spike (blue) and total inactivated  
19 vaccine-induced T cell response (red; Spike, Membrane and Nucleoprotein) against the Omicron  
20 variant of concern in vaccinees from both Inactivated and Heterologous cohorts were calculated using  
21 IFN- $\gamma$  (left) or IL-2 (right) concentrations from whole blood CRA and displayed as bars.

22

23 **Table 1. Demographics of vaccinees from the 3 study cohorts.**

24

25

26

1 **STAR Methods**

2 **Key resource table**

| Reagent or Resource                                                      | Source                                  | Identifier                                                                                                                    |
|--------------------------------------------------------------------------|-----------------------------------------|-------------------------------------------------------------------------------------------------------------------------------|
| <b>Antibodies</b>                                                        |                                         |                                                                                                                               |
| Anti-human IFN- $\gamma$ coating antibody                                | Mabtech                                 | Cat# 3420-3-1000; RRID: AB_907282                                                                                             |
| Anti-human IFN- $\gamma$ biotin                                          | Mabtech                                 | Cat# 3420-6-1000; RRID: AB_907272                                                                                             |
| Brilliant Violet 605 anti-human CD3 Antibody                             | Biolegend                               | Cat# 317322; RRID: AB_2561911                                                                                                 |
| Brilliant Violet 650 Mouse anti-human CD4 Antibody                       | BD Horizon™                             | Cat# 563875; RRID: AB_2744425                                                                                                 |
| PE/Cyanine7 Mouse anti-human CD8 Antibody                                | BD Pharmingen™                          | Cat# 557746; RRID: AB_396852                                                                                                  |
| V450 Mouse anti-human CD25 Antibody                                      | BD Horizon™                             | Cat# 560355; RRID: AB_1645565                                                                                                 |
| Alexa Fluor® 700 anti-human CD69 Antibody                                | Biolegend                               | Cat# 310922; RRID: AB_493775                                                                                                  |
| PE anti-human CD134 (OX40) Antibody                                      | Biolegend                               | Cat# 350004; RRID: AB_10645478                                                                                                |
| APC Mouse anti-human CD137 Antibody                                      | BD Pharmingen™                          | Cat# 550890; RRID: AB_398477                                                                                                  |
| <b>Biological samples</b>                                                |                                         |                                                                                                                               |
| Blood from individuals who received SARS-CoV-2 vaccine                   | National Centre for Infectious Diseases | N/A                                                                                                                           |
| <b>Chemicals, peptides, and recombinant proteins</b>                     |                                         |                                                                                                                               |
| Ficoll-paque plus                                                        | Cytiva                                  | Cat# 17144003                                                                                                                 |
| Zombie NIR Fixable Viability Kit                                         | Biolegend                               | Cat# 423105                                                                                                                   |
| Streptavidin-ALP                                                         | Mabtech                                 | Cat# 3310-10-1000                                                                                                             |
| KPL BCIP/NBT Phosphatase substrate                                       | SeraCare                                | Cat# 5420-0038                                                                                                                |
| 15-mer SARS-CoV-2 overlapping Spike, Nucleoprotein and Membrane peptides | Genscript                               | N/A                                                                                                                           |
| <b>Critical commercial kit</b>                                           |                                         |                                                                                                                               |
| Ella multianalyte immunoassay                                            | Protein simple                          | N/A                                                                                                                           |
| EasySep Human CD4 Positive Selection Kits II                             | Stemcell Technologies                   | Cat# 17852                                                                                                                    |
| EasySep Human CD8 Positive Selection Kits II                             | Stemcell Technologies                   | Cat# 17853                                                                                                                    |
| <b>Deposited data</b>                                                    |                                         |                                                                                                                               |
| No unique dataset was generated                                          | N/A                                     | N/A                                                                                                                           |
| <b>Software and algorithms</b>                                           |                                         |                                                                                                                               |
| Graphpad Prism 9                                                         | Graphpad                                | <a href="https://www.graphpad.com/scientific-software/prism/">https://www.graphpad.com/scientific-software/prism/</a>         |
| Immunospot software                                                      | Cellular Technology Limited             | <a href="http://www.immunospot.com/ImmunoSpot-analyzers-software">http://www.immunospot.com/ImmunoSpot-analyzers-software</a> |
| Kaluza Analysis Software                                                 | Beckman Coulter                         | <a href="https://www.beckman.com/flow-cytometry/software/kaluza">https://www.beckman.com/flow-cytometry/software/kaluza</a>   |

3

4 **Resource availability**

5 *Lead contact*

1 Further information and requests for resources and reagents should be directed to and will be fulfilled  
2 by the lead contacts, Anthony T Tan ([anthony.tan@duke-nus.edu.sg](mailto:anthony.tan@duke-nus.edu.sg)) and Antonio Bertoletti  
3 ([antonio@duke-nus.edu.sg](mailto:antonio@duke-nus.edu.sg)).

4

#### 5 *Material availability*

6 This study did not generate new unique reagents.

7

#### 8 *Data and code availability*

9 This study did not generate any unique datasets or new codes.

10

### 11 **Experimental model and subject details**

12 The study design and protocol for the COVID-19 PROTECT study group were assessed by National  
13 Healthcare Group (NHG) Domain Specific Review Board (DSRB) and approved under study number  
14 2012/00917. Written informed consent was obtained from all study participants in accordance with  
15 the Declaration of Helsinki for Human Research.

16

17 3 cohorts of vaccinated healthy individuals were studied (Table 1). Vaccinated individuals were  
18 between 22-69 years of age, healthy and with no history of SARS-CoV-2 infection. The first cohort  
19 (Inactivated cohort) are healthy individuals who received two doses of BBIBP inactivated vaccine  
20 (Sinopharm) given 21 days apart (n=30). The second cohort (Heterologous cohort) are healthy  
21 individuals who developed adverse events after receiving a single dose of mRNA vaccine and  
22 proceeded to switch to vaccination with two doses of CoronaVac inactivated vaccine (Sinovac) given  
23 21 days apart (n=19). A reference cohort (mRNA cohort) of healthy individuals who received two  
24 doses of Spike mRNA vaccine (Pfizer-BioNTech or Moderna) were also analysed (n=79). Blood samples  
25 were collected before receiving inactivated vaccines (Inactivated and Heterologous cohort) or mRNA  
26 vaccines (mRNA cohort), 21 days and 2-3 months post-vaccination (Figure 1A). Local policy changes  
27 recommended the inclusion of a third dose of inactivated SARS-CoV-2 vaccines into the primary  
28 vaccination series 3 months after the administration of the second dose. To assess the effects of this  
29 booster dose of inactivated vaccines, blood samples of individuals from the inactivated and  
30 heterologous cohort were also collected 6 months post-vaccination. A total of 18 individuals in the  
31 Inactivated cohort and 7 in the Heterologous cohort were given the booster dose 1-3 months and <1  
32 month before blood collection respectively.

33

### 34 **Method details**

1 *Peptides*

2 15-mer peptides that overlapped by 10 amino acids spanning the entire protein sequences of  
3 Nucleoprotein, Membrane and Spike protein of SARS-CoV-2 were synthesized and pooled into mega-  
4 pools. In addition, 55 Spike peptides covering the immunogenic regions of the SARS-CoV-2 spike  
5 protein representing 40.5% of the whole Spike protein (SpG peptide pool) were also synthesized,  
6 pooled and used to stimulate whole blood as described previously<sup>29</sup>. To measure the T cell response  
7 against the Omicron variant, two additional peptide pools were designed for each viral structural  
8 protein (Membrane, Nucleoprotein and Spike). The two pools include peptides impacted by the  
9 mutations in Omicron, with one consisting of ancestral-derived peptides and another consisting of  
10 Omicron-derived peptides covering the same region. Details of all the peptides used are found in  
11 Supplementary Tables 1-4.

12

13 *Whole blood cytokine release assay*

14 The whole blood cytokine release assay was performed as described previously<sup>29</sup>. In brief, 320  $\mu$ l of  
15 freshly drawn blood (drawn within 6 hours of venepuncture) were mixed with 80  $\mu$ l RPMI and  
16 stimulated with the indicated SARS-CoV-2 Spike peptide pools (Supplementary Table 1) at 2  $\mu$ g/ml or  
17 with DMSO as a control. After 16 hours of incubation, the culture supernatant (plasma) was collected  
18 and stored at -30°C. Cytokine concentrations in the plasma were quantified using an ELLA machine  
19 with microfluidic multiplex cartridges that measured IFN- $\gamma$  and IL-2 according to the manufacturer's  
20 protocol (Protein Simple). The levels of cytokines present in the plasma of DMSO controls were  
21 subtracted from the corresponding peptide pool-stimulated samples. The positivity threshold was set  
22 at 10x times the lower limit of quantification of each cytokine (IFN- $\gamma$  = 1.7pg/ml; IL-2 = 5.4pg/ml) after  
23 DMSO background subtraction.

24

25 *PBMC isolation*

26 Peripheral blood was collected from all individuals in heparin-containing tubes, and peripheral blood  
27 mononuclear cells (PBMCs) from all collected blood samples were isolated by Ficoll-Paque density  
28 gradient centrifugation. Isolated PBMCs were either analysed directly or cryopreserved in liquid  
29 nitrogen until required.

30

31 *Depletion of CD4+ or CD8+ T cells*

32 CD4+ or CD8+ T cells were positively selected from freshly isolated PBMCs with EasySep Positive  
33 Selection Kits II (Stemcell Technologies). After magnetic affinity cell sorting, flow through consisting

1 of CD4-enriched and CD8-enriched PBMCs were collected and used immediately for IFN- $\gamma$  ELISPOT  
2 assay.

3

#### 4 *IFN- $\gamma$ ELISPOT Assay*

5 The frequency of SARS-CoV-2 specific T cells was quantified as described previously<sup>29</sup>. Briefly, ELISPOT  
6 plates (Millipore Sigma) were coated with human IFN- $\gamma$  antibody overnight at 4°C. 250,000 to 400,000  
7 total, CD4-enriched or CD8-enriched PBMCs were seeded per well and stimulated for 18 hours with  
8 the indicated peptide pools at 1  $\mu$ g/mL. The plates were then incubated with a human biotinylated  
9 IFN- $\gamma$  detection antibody, followed by streptavidin–alkaline phosphatase (streptavidin-AP) and  
10 developed using the KPL BCIP/NBT phosphatase substrate (Seracare Life Sciences). To quantify the  
11 peptide-specific responses, spots of the unstimulated wells were subtracted from the peptide-  
12 stimulated wells, and the results were expressed as spot-forming cells (SFC) per 10<sup>6</sup> PBMCs. Results  
13 were excluded if negative control wells had more than 30 SFC/10<sup>6</sup> PBMCs or if positive control wells  
14 stimulated with PMA/ionomycin were negative.

15

#### 16 *Activation-induced marker (AIM) assay*

17 Cryopreserved PBMCs were thawed and stimulated with 1  $\mu$ g/mL mega-pool Spike peptides or  
18 equivalent amount of DMSO for 24 hours at 37°C. Cells were then washed in phosphate buffered  
19 saline and stained with Zombie NIR Fixable Viability Kit (Biolegend) to exclude dead cells in the  
20 analysis. The cells were next washed in FACS buffer with 2mM EDTA and surface markers were stained  
21 with the surface markers, anti-CD3, anti-CD4, anti-CD8, anti-CD25, anti-CD69, anti-CD134 (OX40) and  
22 anti-CD137 (4-1BB), diluted in FACS buffer for 30 minutes on ice. After two more washes in FACS  
23 buffer, cells were resuspended in PBS prior to acquisition with Beckman Coulter CytoFLEX S analyser.

24

#### 25 **Quantification and statistical analysis**

26 All statistical analyses were performed using GraphPad Prism, version 9 (GraphPad Software). Where  
27 applicable, the statistical tests used and the definition of centre were indicated in the figure legends.  
28 Statistical significance was defined as having a P-value of less than 0.05. In all instances, “n” refers to  
29 the number of patients analysed.

30

31

32

1 **Supplemental Information**

2 **Supplementary Figure 1. Representative flow cytometry analysis of CD4 enriched, CD8 enriched and**  
3 **total PBMCs.**

4

5 **Supplementary Figure 2. Phenotypic analysis of Spike-specific T cells induced by inactivated SARS-**  
6 **CoV-2 vaccine.** PBMCs were isolated from whole blood of individuals in the inactivated cohort 2-3  
7 months post-vaccination. The PBMCs were stimulated with the Spike mega-pool or left unstimulated  
8 as a control, and the upregulation of T cell activation markers on the CD4 and CD8 T cell subsets were  
9 quantified through flow cytometry. The frequency of AIM+ CD4 (CD25+ OX40+ 41BB+) and CD8  
10 (CD69+ 41BB+) T cells before and after stimulation with Spike mega-pool (n=6) are shown in panel A  
11 and B respectively. Differences were analysed with Mann Whitney test and only significant P values  
12 are shown (\*\*\*\*:  $P \leq 0.0001$ ; \*\*\*:  $P \leq 0.001$ ; \*\*:  $P \leq 0.01$ ; \*:  $P \leq 0.05$ ). Dot plots shows the AIM+ CD4 and  
13 CD8 T cell frequencies before and after Spike mega-pool stimulation in a representative individual.

14

15 **Supplementary Figure 3. CD4 Membrane- and Nucleoprotein-specific T cells were induced after**  
16 **vaccination with inactivated SARS-CoV-2.** PBMCs collected from the 2 cohorts of vaccinees 2-3  
17 months after vaccination (Inactivated: n=6; Heterologous: n=4) were either depleted of CD8 or CD4 T  
18 cells through negative selection before stimulation with overlapping peptides covering the entire  
19 Membrane and Nucleoprotein for ELISPOT. Total PBMCs were also analysed as a control. Bars denote  
20 the IFN- $\gamma$  SFU quantified for each vaccinee after stimulating CD4-enriched (green), CD8 enriched (blue)  
21 or total PBMCs (grey) with Membrane (top) or Nucleoprotein (bottom) overlapping peptides.  
22 Representative ELISPOT well images of the respective peptide stimulated cell populations are shown.

23

24 **Supplementary Table 1. SARS-CoV-2 Spike-specific peptide sequence.**

25

26 **Supplementary Table 2. SARS-CoV-2 Membrane-specific peptide sequence.**

27

28 **Supplementary Table 3. SARS-CoV-2 Nucleoprotein-specific peptide sequence.**

29

30 **Supplementary Table 1. SARS-CoV-2 Omicron VOC peptide sequence.**

31

32

## 1 References

- 2 1. Krause, P.R., Fleming, T.R., Peto, R., Longini, I.M., Figueroa, J.P., Sterne, J.A.C., Cravioto, A.,  
3 Rees, H., Higgins, J.P.T., Boutron, I., et al. (2021). Considerations in boosting COVID-19 vaccine  
4 immune responses. *Lancet* 398, 1377-1380. 10.1016/S0140-6736(21)02046-8.
- 5 2. Mallapaty, S. (2021). China's COVID vaccines have been crucial - now immunity is waning.  
6 *Nature* 598, 398-399. 10.1038/d41586-021-02796-w.
- 7 3. McKinstry, K.K., Strutt, T.M., Kuang, Y., Brown, D.M., Sell, S., Dutton, R.W., and Swain, S.L.  
8 (2012). Memory CD4+ T cells protect against influenza through multiple synergizing  
9 mechanisms. *J Clin Invest* 122, 2847-2856. 10.1172/JCI63689.
- 10 4. Cromer, D., Steain, M., Reynaldi, A., Schlub, T.E., Wheatley, A.K., Juno, J.A., Kent, S.J., Triccas,  
11 J.A., Houry, D.S., and Davenport, M.P. (2022). Neutralising antibody titres as predictors of  
12 protection against SARS-CoV-2 variants and the impact of boosting: a meta-analysis. *Lancet*  
13 *Microbe* 3, e52-e61. 10.1016/S2666-5247(21)00267-6.
- 14 5. Jeewandara, C., Aberathna, I.S., Pushpakumara, P.D., Kamaladasa, A., Guruge, D., Wijesinghe,  
15 A., Gunasekera, B., Tanussiya, S., Kuruppu, H., Ranasinghe, T., et al. (2021). Persistence of  
16 immune responses to the Sinopharm/BBIBP-CorV vaccine. *Immunity, Inflammation and*  
17 *Disease*. 10.1101/2021.10.14.21265030.
- 18 6. Peng, Q., Zhou, R., Wang, Y., Zhao, M., Liu, N., Li, S., Huang, H., Yang, D., Au, K.K., Wang, H., et  
19 al. (2022). Waning immune responses against SARS-CoV-2 variants of concern among  
20 vaccinees in Hong Kong. *EBioMedicine* 77, 103904. 10.1016/j.ebiom.2022.103904.
- 21 7. Zeng, G., Wu, Q., Pan, H., Li, M., Yang, J., Wang, L., Wu, Z., Jiang, D., Deng, X., Chu, K., et al.  
22 (2022). Immunogenicity and safety of a third dose of CoronaVac, and immune persistence of  
23 a two-dose schedule, in healthy adults: interim results from two single-centre, double-blind,  
24 randomised, placebo-controlled phase 2 clinical trials. *Lancet Infect Dis* 22, 483-495.  
25 10.1016/S1473-3099(21)00681-2.
- 26 8. Zhang, H., Jia, Y., Ji, Y., Cong, X., Liu, Y., Yang, R., Kong, X., Shi, Y., Zhu, L., Wang, Z., et al. (2022).  
27 Inactivated Vaccines Against SARS-CoV-2: Neutralizing Antibody Titers in Vaccine Recipients.  
28 *Front Microbiol* 13, 816778. 10.3389/fmicb.2022.816778.
- 29 9. Lim, W.W., Mak, L., Leung, G.M., Cowling, B.J., and Peiris, M. (2021). Comparative  
30 immunogenicity of mRNA and inactivated vaccines against COVID-19. *Lancet Microbe* 2, e423.  
31 10.1016/S2666-5247(21)00177-4.
- 32 10. Tarke, A., Coelho, C.H., Zhang, Z., Dan, J.M., Yu, E.D., Methot, N., Bloom, N.I., Goodwin, B.,  
33 Phillips, E., Mallal, S., et al. (2022). SARS-CoV-2 vaccination induces immunological T cell  
34 memory able to cross-recognize variants from Alpha to Omicron. *Cell* 185, 847-859 e811.  
35 10.1016/j.cell.2022.01.015.
- 36 11. Goel, R.R., Painter, M.M., Apostolidis, S.A., Mathew, D., Meng, W., Rosenfeld, A.M.,  
37 Lundgreen, K.A., Reynaldi, A., Houry, D.S., Pattekar, A., et al. (2021). mRNA vaccines induce  
38 durable immune memory to SARS-CoV-2 and variants of concern. *Science* 374, abm0829.  
39 10.1126/science.abm0829.
- 40 12. Guerrero, G., Picozza, M., D'Orso, S., Placido, R., Pirronello, M., Verdiani, A., Termine, A.,  
41 Fabrizio, C., Giannessi, F., Sambucci, M., et al. (2021). BNT162b2 vaccination induces durable  
42 SARS-CoV-2-specific T cells with a stem cell memory phenotype. *Sci Immunol* 6, eabl5344.  
43 10.1126/sciimmunol.abl5344.
- 44 13. Doria-Rose, N., Suthar, M.S., Makowski, M., O'Connell, S., McDermott, A.B., Flach, B.,  
45 Ledgerwood, J.E., Mascola, J.R., Graham, B.S., Lin, B.C., et al. (2021). Antibody Persistence  
46 through 6 Months after the Second Dose of mRNA-1273 Vaccine for Covid-19. *N Engl J Med*  
47 384, 2259-2261. 10.1056/NEJMc2103916.
- 48 14. Pegu, A., O'Connell, S.E., Schmidt, S.D., O'Dell, S., Talana, C.A., Lai, L., Albert, J., Anderson, E.,  
49 Bennett, H., Corbett, K.S., et al. (2021). Durability of mRNA-1273 vaccine-induced antibodies  
50 against SARS-CoV-2 variants. *Science* 373, 1372-1377. 10.1126/science.abj4176.



- 1 15. Terpos, E., Karalis, V., Ntanasis-Stathopoulos, I., Evangelakou, Z., Gavriatopoulou, M., Manola,  
2 M.S., Malandrakis, P., Gianniou, D.D., Kastritis, E., Trougkos, I.P., and Dimopoulos, M.A.  
3 (2022). Comparison of Neutralizing Antibody Responses at 6 Months Post Vaccination with  
4 BNT162b2 and AZD1222. *Biomedicines* *10*. 10.3390/biomedicines10020338.
- 5 16. Premikha, M., Chiew, C.J., Wei, W.E., Leo, Y.S., Ong, B., Lye, D.C., Lee, V.J., and Tan, K.B. (2022).  
6 Comparative Effectiveness of mRNA and Inactivated Whole Virus Vaccines against COVID-19  
7 Infection and Severe Disease in Singapore. *Clin Infect Dis*. 10.1093/cid/ciac288.
- 8 17. Vardhana, S., Baldo, L., Morice, W.G., 2nd, and Wherry, E.J. (2022). Understanding T cell  
9 responses to COVID-19 is essential for informing public health strategies. *Sci Immunol* *7*,  
10 eabo1303. 10.1126/sciimmunol.abo1303.
- 11 18. Geers, D., Shamier, M.C., Bogers, S., den Hartog, G., Gommers, L., Nieuwkoop, N.N., Schmitz,  
12 K.S., Rijsbergen, L.C., van Osch, J.A.T., Dijkhuizen, E., et al. (2021). SARS-CoV-2 variants of  
13 concern partially escape humoral but not T-cell responses in COVID-19 convalescent donors  
14 and vaccinees. *Sci Immunol* *6*. 10.1126/sciimmunol.abj1750.
- 15 19. Tarke, A., Sidney, J., Methot, N., Yu, E.D., Zhang, Y., Dan, J.M., Goodwin, B., Rubiro, P.,  
16 Sutherland, A., Wang, E., et al. (2021). Impact of SARS-CoV-2 variants on the total CD4(+) and  
17 CD8(+) T cell reactivity in infected or vaccinated individuals. *Cell Rep Med* *2*, 100355.  
18 10.1016/j.xcrm.2021.100355.
- 19 20. Jara, A., Undurraga, E.A., Gonzalez, C., Paredes, F., Fontecilla, T., Jara, G., Pizarro, A., Acevedo,  
20 J., Leo, K., Leon, F., et al. (2021). Effectiveness of an Inactivated SARS-CoV-2 Vaccine in Chile.  
21 *N Engl J Med* *385*, 875-884. 10.1056/NEJMoa2107715.
- 22 21. Ranzani, O.T., Hitchings, M.D.T., Dorion, M., D'Agostini, T.L., de Paula, R.C., de Paula, O.F.P.,  
23 Villela, E.F.M., Torres, M.S.S., de Oliveira, S.B., Schulz, W., et al. (2021). Effectiveness of the  
24 CoronaVac vaccine in older adults during a gamma variant associated epidemic of covid-19 in  
25 Brazil: test negative case-control study. *BMJ* *374*, n2015. 10.1136/bmj.n2015.
- 26 22. Kang, M., Yi, Y., Li, Y., Sun, L., Deng, A., Hu, T., Zhang, J., Liu, J., Cheng, M., Xie, S., et al. (2022).  
27 Effectiveness of Inactivated COVID-19 Vaccines Against Illness Caused by the B.1.617.2 (Delta)  
28 Variant During an Outbreak in Guangdong, China : A Cohort Study. *Ann Intern Med* *175*, 533-  
29 540. 10.7326/M21-3509.
- 30 23. Hu, Z., Tao, B., Li, Z., Song, Y., Yi, C., Li, J., Zhu, M., Yi, Y., Huang, P., and Wang, J. (2022).  
31 Effectiveness of inactivated COVID-19 vaccines against severe illness in B.1.617.2 (Delta)  
32 variant-infected patients in Jiangsu, China. *Int J Infect Dis* *116*, 204-209.  
33 10.1016/j.ijid.2022.01.030.
- 34 24. Rotshild, V., Hirsh-Racah, B., Miskin, I., Muszkat, M., and Matok, I. (2021). Comparing the  
35 clinical efficacy of COVID-19 vaccines: a systematic review and network meta-analysis. *Sci Rep*  
36 *11*, 22777. 10.1038/s41598-021-02321-z.
- 37 25. Deng, Y., Li, Y., Yang, R., and Tan, W. (2021). SARS-CoV-2-specific T cell immunity to structural  
38 proteins in inactivated COVID-19 vaccine recipients. *Cell Mol Immunol* *18*, 2040-2041.  
39 10.1038/s41423-021-00730-8.
- 40 26. Lau, Y.-L., Duque, J.R., Wang, X., Leung, D., Cheng, S., Cohen, C., Mu, X., Hachim, A., Zhang, Y.,  
41 Chan, S.-M., et al. (07 May 2022). Immunogenicity and reactogenicity of SARS-CoV-2 mRNA  
42 and inactivated vaccines in healthy adolescents. PREPRINT (version 1) available at Research  
43 Square [<https://doi.org/10.21203/rs.3.rs-1327020/v1>].
- 44 27. Pishesha, N., Harmand, T.J., and Ploegh, H.L. (2022). A guide to antigen processing and  
45 presentation. *Nat Rev Immunol*. 10.1038/s41577-022-00707-2.
- 46 28. Ho, N.I., Huis In 't Veld, L.G.M., Raaijmakers, T.K., and Adema, G.J. (2018). Adjuvants Enhancing  
47 Cross-Presentation by Dendritic Cells: The Key to More Effective Vaccines? *Front Immunol* *9*,  
48 2874. 10.3389/fimmu.2018.02874.
- 49 29. Tan, A.T., Lim, J.M., Le Bert, N., Kunasegaran, K., Chia, A., Qui, M.D., Tan, N., Chia, W.N., de  
50 Alwis, R., Ying, D., et al. (2021). Rapid measurement of SARS-CoV-2 spike T cells in whole blood  
51 from vaccinated and naturally infected individuals. *J Clin Invest* *131*. 10.1172/JCI152379.

- 1 30. Liu, C., Mendonca, L., Yang, Y., Gao, Y., Shen, C., Liu, J., Ni, T., Ju, B., Liu, C., Tang, X., et al.  
2 (2020). The Architecture of Inactivated SARS-CoV-2 with Postfusion Spikes Revealed by Cryo-  
3 EM and Cryo-ET. *Structure* 28, 1218-1224 e1214. 10.1016/j.str.2020.10.001.
- 4 31. Gao, Q., Bao, L., Mao, H., Wang, L., Xu, K., Yang, M., Li, Y., Zhu, L., Wang, N., Lv, Z., et al. (2020).  
5 Development of an inactivated vaccine candidate for SARS-CoV-2. *Science* 369, 77-81.  
6 10.1126/science.abc1932.
- 7 32. Andrews, N., Stowe, J., Kirsebom, F., Toffa, S., Rickeard, T., Gallagher, E., Gower, C., Kall, M.,  
8 Groves, N., O'Connell, A.M., et al. (2022). Covid-19 Vaccine Effectiveness against the Omicron  
9 (B.1.1.529) Variant. *N Engl J Med* 386, 1532-1546. 10.1056/NEJMoa2119451.
- 10 33. Planas, D., Saunders, N., Maes, P., Guivel-Benhassine, F., Planchais, C., Buchrieser, J., Bolland,  
11 W.H., Porrot, F., Staropoli, I., Lemoine, F., et al. (2022). Considerable escape of SARS-CoV-2  
12 Omicron to antibody neutralization. *Nature* 602, 671-675. 10.1038/s41586-021-04389-z.
- 13 34. Tan, A.T., Linster, M., Tan, C.W., Le Bert, N., Chia, W.N., Kunasegaran, K., Zhuang, Y., Tham,  
14 C.Y.L., Chia, A., Smith, G.J.D., et al. (2021). Early induction of functional SARS-CoV-2-specific T  
15 cells associates with rapid viral clearance and mild disease in COVID-19 patients. *Cell Rep* 34,  
16 108728. 10.1016/j.celrep.2021.108728.
- 17 35. Le Bert, N., Clapham, H.E., Tan, A.T., Chia, W.N., Tham, C.Y.L., Lim, J.M., Kunasegaran, K., Tan,  
18 L.W.L., Dutertre, C.A., Shankar, N., et al. (2021). Highly functional virus-specific cellular  
19 immune response in asymptomatic SARS-CoV-2 infection. *J Exp Med* 218.  
20 10.1084/jem.20202617.
- 21 36. Sekine, T., Perez-Potti, A., Rivera-Ballesteros, O., Stralin, K., Gorin, J.B., Olsson, A., Llewellyn-  
22 Lacey, S., Kamal, H., Bogdanovic, G., Muschiol, S., et al. (2020). Robust T Cell Immunity in  
23 Convalescent Individuals with Asymptomatic or Mild COVID-19. *Cell* 183, 158-168 e114.  
24 10.1016/j.cell.2020.08.017.
- 25 37. Sette, A., and Crotty, S. (2021). Adaptive immunity to SARS-CoV-2 and COVID-19. *Cell* 184,  
26 861-880. 10.1016/j.cell.2021.01.007.
- 27 38. Ferretti, A.P., Kula, T., Wang, Y., Nguyen, D.M.V., Weinheimer, A., Dunlap, G.S., Xu, Q., Nabils,  
28 N., Perullo, C.R., Cristofaro, A.W., et al. (2020). Unbiased Screens Show CD8(+) T Cells of  
29 COVID-19 Patients Recognize Shared Epitopes in SARS-CoV-2 that Largely Reside outside the  
30 Spike Protein. *Immunity* 53, 1095-1107 e1093. 10.1016/j.immuni.2020.10.006.
- 31 39. Harris, P.E., Brasel, T., Massey, C., Herst, C.V., Burkholz, S., Lloyd, P., Blankenberg, T., Bey, T.M.,  
32 Carback, R., Hodge, T., et al. (2021). A Synthetic Peptide CTL Vaccine Targeting Nucleocapsid  
33 Confers Protection from SARS-CoV-2 Challenge in Rhesus Macaques. *Vaccines (Basel)* 9.  
34 10.3390/vaccines9050520.
- 35 40. Matchett, W.E., Joag, V., Stolley, J.M., Shepherd, F.K., Quarnstrom, C.F., Mickelson, C.K.,  
36 Wijeyesinghe, S., Soerens, A.G., Becker, S., Thiede, J.M., et al. (2021). Cutting Edge:  
37 Nucleocapsid Vaccine Elicits Spike-Independent SARS-CoV-2 Protective Immunity. *J Immunol*  
38 207, 376-379. 10.4049/jimmunol.2100421.
- 39 41. Chen, J., Deng, Y., Huang, B., Han, D., Wang, W., Huang, M., Zhai, C., Zhao, Z., Yang, R., Zhao,  
40 Y., et al. (2022). DNA Vaccines Expressing the Envelope and Membrane Proteins Provide  
41 Partial Protection Against SARS-CoV-2 in Mice. *Front Immunol* 13, 827605.  
42 10.3389/fimmu.2022.827605.
- 43 42. Qui, M., Le Bert, N., Chan, W.P.W., Tan, M., Hang, S.K., Hariharaputran, S., Sim, J.X.Y., Low,  
44 J.G.H., Ng, W., Wan, W.Y., et al. (2022). Favorable vaccine-induced SARS-CoV-2 specific T cell  
45 response profile in patients undergoing immune-modifying therapies. *J Clin Invest.*  
46 10.1172/JCI159500.
- 47 43. Gao, Y., Cai, C., Grifoni, A., Muller, T.R., Niessl, J., Olofsson, A., Humbert, M., Hansson, L.,  
48 Osterborg, A., Bergman, P., et al. (2022). Ancestral SARS-CoV-2-specific T cells cross-recognize  
49 the Omicron variant. *Nat Med* 28, 472-476. 10.1038/s41591-022-01700-x.

- 1 44. Jung, M.K., Jeong, S.D., Noh, J.Y., Kim, D.U., Jung, S., Song, J.Y., Jeong, H.W., Park, S.H., and  
2 Shin, E.C. (2022). BNT162b2-induced memory T cells respond to the Omicron variant with  
3 preserved polyfunctionality. *Nat Microbiol.* 10.1038/s41564-022-01123-x.
- 4 45. Keeton, R., Tincho, M.B., Ngomti, A., Baguma, R., Benede, N., Suzuki, A., Khan, K., Cele, S.,  
5 Bernstein, M., Karim, F., et al. (2022). T cell responses to SARS-CoV-2 spike cross-recognize  
6 Omicron. *Nature* 603, 488-492. 10.1038/s41586-022-04460-3.
- 7 46. GeurtsvanKessel, C.H., Geers, D., Schmitz, K.S., Mykytyn, A.Z., Lamers, M.M., Bogers, S.,  
8 Scherbeijn, S., Gommers, L., Sablerolles, R.S.G., Nieuwkoop, N.N., et al. (2022). Divergent  
9 SARS-CoV-2 Omicron-reactive T and B cell responses in COVID-19 vaccine recipients. *Sci*  
10 *Immunol* 7, eabo2202. 10.1126/sciimmunol.abo2202.
- 11 47. Liu, J., Chandrashekar, A., Sellers, D., Barrett, J., Jacob-Dolan, C., Lifton, M., McMahan, K.,  
12 Sciacca, M., VanWyk, H., Wu, C., et al. (2022). Vaccines elicit highly conserved cellular  
13 immunity to SARS-CoV-2 Omicron. *Nature* 603, 493-496. 10.1038/s41586-022-04465-y.
- 14 48. Naranbhai, V., Nathan, A., Kaseke, C., Berrios, C., Khatri, A., Choi, S., Getz, M.A., Tano-Menka,  
15 R., Ofoman, O., Gayton, A., et al. (2022). T cell reactivity to the SARS-CoV-2 Omicron variant is  
16 preserved in most but not all individuals. *Cell* 185, 1041-1051 e1046.  
17 10.1016/j.cell.2022.01.029.
- 18 49. Zhang, Z., Mateus, J., Coelho, C.H., Dan, J.M., Moderbacher, C.R., Galvez, R.I., Cortes, F.H.,  
19 Grifoni, A., Tarke, A., Chang, J., et al. (2022). Humoral and cellular immune memory to four  
20 COVID-19 vaccines. *bioRxiv*. 10.1101/2022.03.18.484953.
- 21 50. Munro, A.P.S., Janani, L., Cornelius, V., Aley, P.K., Babbage, G., Baxter, D., Bula, M., Cathie, K.,  
22 Chatterjee, K., Dodd, K., et al. (2021). Safety and immunogenicity of seven COVID-19 vaccines  
23 as a third dose (booster) following two doses of ChAdOx1 nCov-19 or BNT162b2 in the UK  
24 (COV-BOOST): a blinded, multicentre, randomised, controlled, phase 2 trial. *Lancet* 398, 2258-  
25 2276. 10.1016/S0140-6736(21)02717-3.
- 26 51. Khoo, N.K.H., Lim, J.M.E., Gill, U.S., de Alwis, R., Tan, N., Toh, J.Z.N., Abbott, J.E., Usai, C., Ooi,  
27 E.E., Low, J.G.H., et al. (2022). Differential immunogenicity of homologous versus  
28 heterologous boost in Ad26.COV2.S vaccine recipients. *Med (N Y)* 3, 104-118 e104.  
29 10.1016/j.medj.2021.12.004.
- 30 52. Skibinski, D.A.G., Jones, L.A., Zhu, Y.O., Xue, L.W., Au, B., Lee, B., Naim, A.N.M., Lee, A.,  
31 Kaliaperumal, N., Low, J.G.H., et al. (2018). Induction of Human T-cell and Cytokine Responses  
32 Following Vaccination with a Novel Influenza Vaccine. *Sci Rep* 8, 18007. 10.1038/s41598-018-  
33 36703-7.
- 34 53. Wijaya, L., Tham, C.Y.L., Chan, Y.F.Z., Wong, A.W.L., Li, L.T., Wang, L.F., Bertoletti, A., and Low,  
35 J.G. (2017). An accelerated rabies vaccine schedule based on toll-like receptor 3 (TLR3) agonist  
36 PIKA adjuvant augments rabies virus specific antibody and T cell response in healthy adult  
37 volunteers. *Vaccine* 35, 1175-1183. 10.1016/j.vaccine.2016.12.031.
- 38 54. Kalimuddin, S., Tham, C.Y.L., Qui, M., de Alwis, R., Sim, J.X.Y., Lim, J.M.E., Tan, H.C., Syenina,  
39 A., Zhang, S.L., Le Bert, N., et al. (2021). Early T cell and binding antibody responses are  
40 associated with COVID-19 RNA vaccine efficacy onset. *Med (N Y)* 2, 682-688 e684.  
41 10.1016/j.medj.2021.04.003.
- 42 55. Seder, R.A., and Ahmed, R. (2003). Similarities and differences in CD4+ and CD8+ effector and  
43 memory T cell generation. *Nat Immunol* 4, 835-842. 10.1038/ni969.
- 44 56. Kim, T.S., and Shin, E.C. (2019). The activation of bystander CD8(+) T cells and their roles in  
45 viral infection. *Exp Mol Med* 51, 1-9. 10.1038/s12276-019-0316-1.
- 46 57. Lee, H.G., Cho, M.Z., and Choi, J.M. (2020). Bystander CD4(+) T cells: crossroads between  
47 innate and adaptive immunity. *Exp Mol Med* 52, 1255-1263. 10.1038/s12276-020-00486-7.
- 48 58. McMahan, K., Yu, J., Mercado, N.B., Loos, C., Tostanoski, L.H., Chandrashekar, A., Liu, J., Peter,  
49 L., Atyeo, C., Zhu, A., et al. (2021). Correlates of protection against SARS-CoV-2 in rhesus  
50 macaques. *Nature* 590, 630-634. 10.1038/s41586-020-03041-6.

- 1 59. Zhao, J., Zhao, J., Mangalam, A.K., Channappanavar, R., Fett, C., Meyerholz, D.K., Agnihothram,  
2 S., Baric, R.S., David, C.S., and Perlman, S. (2016). Airway Memory CD4(+) T Cells Mediate  
3 Protective Immunity against Emerging Respiratory Coronaviruses. *Immunity* 44, 1379-1391.  
4 10.1016/j.immuni.2016.05.006.
- 5 60. McMenemy, M.E., Nealon, J., Lin, Y., Wong, J.Y., Cheung, J.K., Lau, E.H.Y., Wu, P., Leung, G.M.,  
6 and Cowling, B.J. (2022). Vaccine effectiveness of two and three doses of BNT162b2 and  
7 CoronaVac against COVID-19 in Hong Kong. medRxiv. 10.1101/2022.03.22.22272769
- 8 61. Liu, Y., Zeng, Q., Deng, C., Li, M., Li, L., Liu, D., Liu, M., Ruan, X., Mei, J., Mo, R., et al. (2022).  
9 Robust induction of B cell and T cell responses by a third dose of inactivated SARS-CoV-2  
10 vaccine. *Cell Discov* 8, 10. 10.1038/s41421-022-00373-7.

11

|                       | <b>Heterologous</b>                                                                 | <b>Inactivated</b>                                | <b>mRNA</b>                                         |
|-----------------------|-------------------------------------------------------------------------------------|---------------------------------------------------|-----------------------------------------------------|
| <b>Characteristic</b> | One dose of mRNA vaccine (BNT162b2 or mRNA-1273) followed by two doses of CoronaVac | Two doses of BBIBP-Corv, 21 days apart            | Two doses of BNT162b2, 21 days apart                |
| <b>N</b>              | 20                                                                                  | 30                                                | 79                                                  |
| <b>Age</b>            | Mean (range): 47.54 (22-69)                                                         | Mean (range): 48.7 (22-74)                        | Mean (range): 38.1 (22-60)                          |
| <b>Sex</b>            | F: 14<br>M: 6                                                                       | F: 16<br>M: 14                                    | F: 55<br>M: 24                                      |
| <b>Race</b>           | Chinese: 18<br>Malay: 2                                                             | Chinese: 26<br>Indian: 1<br>Malay: 1<br>Others: 2 | Chinese: 42<br>Indian: 7<br>Malay: 10<br>Others: 20 |

**Table 1. Demographics of vaccinees from the 3 study cohorts.**

**A**

medRxiv preprint doi: <https://doi.org/10.1101/2022.05.25.22275616>; this version posted May 27, 2022. The copyright holder for this preprint (which was not certified by peer review) is the author/funder, who has granted medRxiv a license to display the preprint in perpetuity. All rights reserved. No reuse allowed without permission.

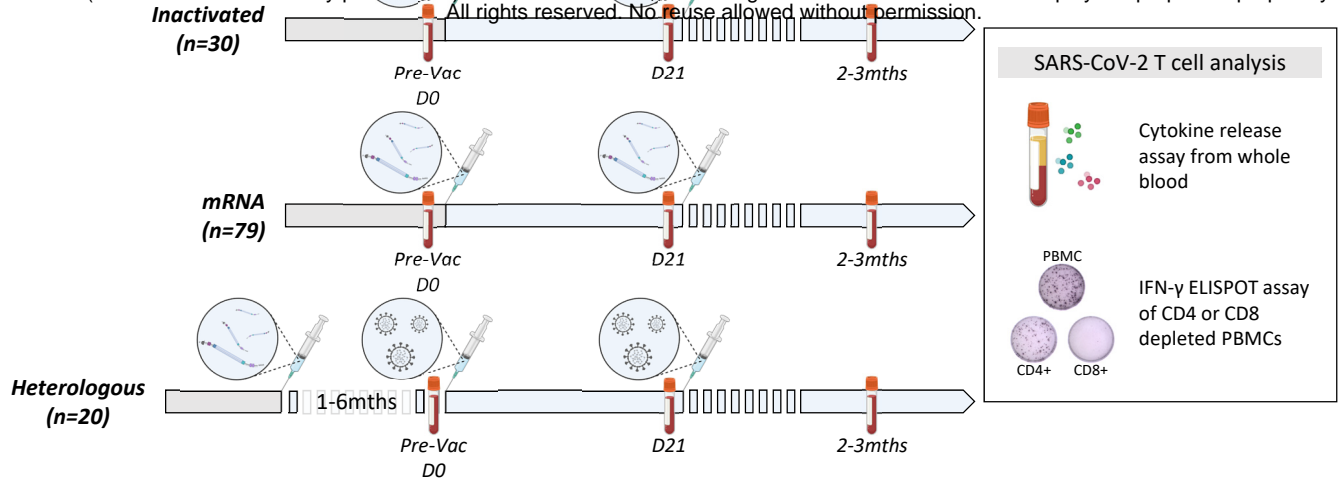**B**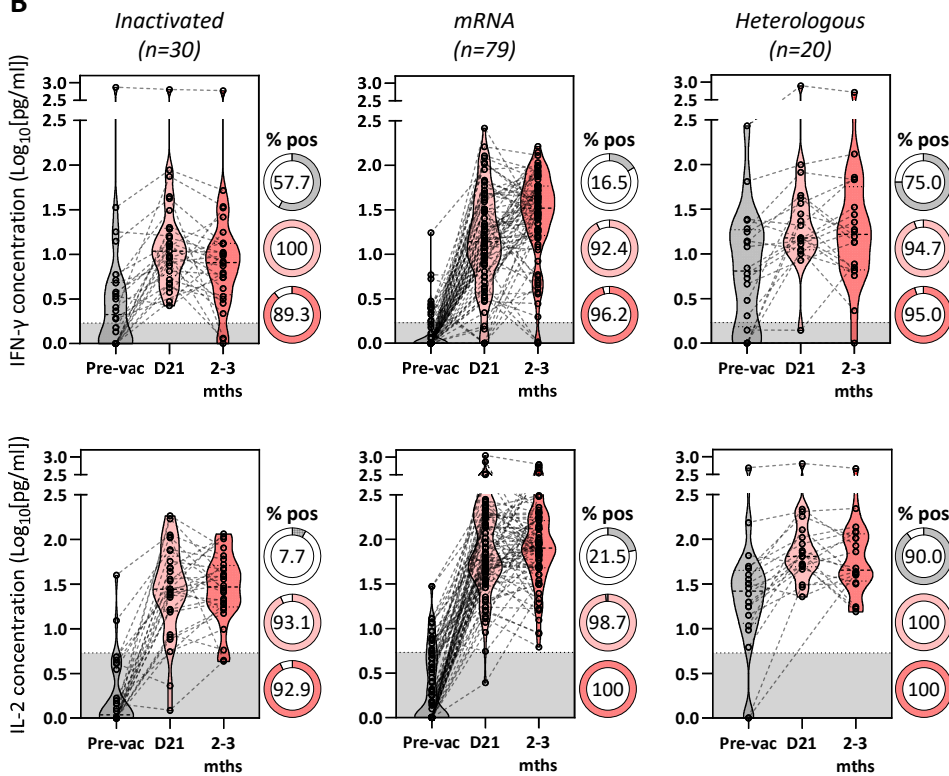**C**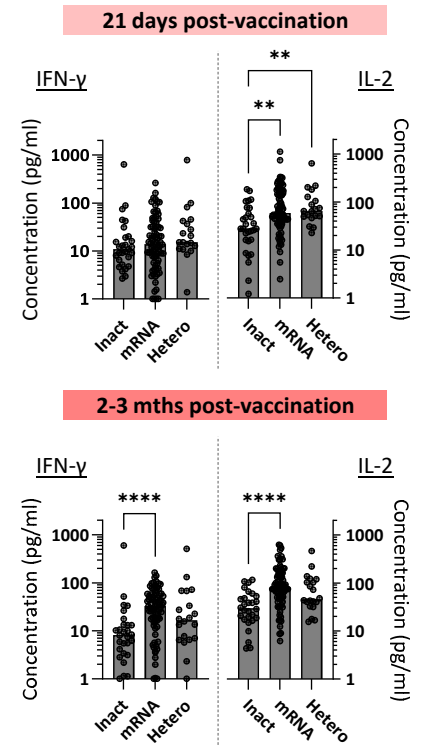**D**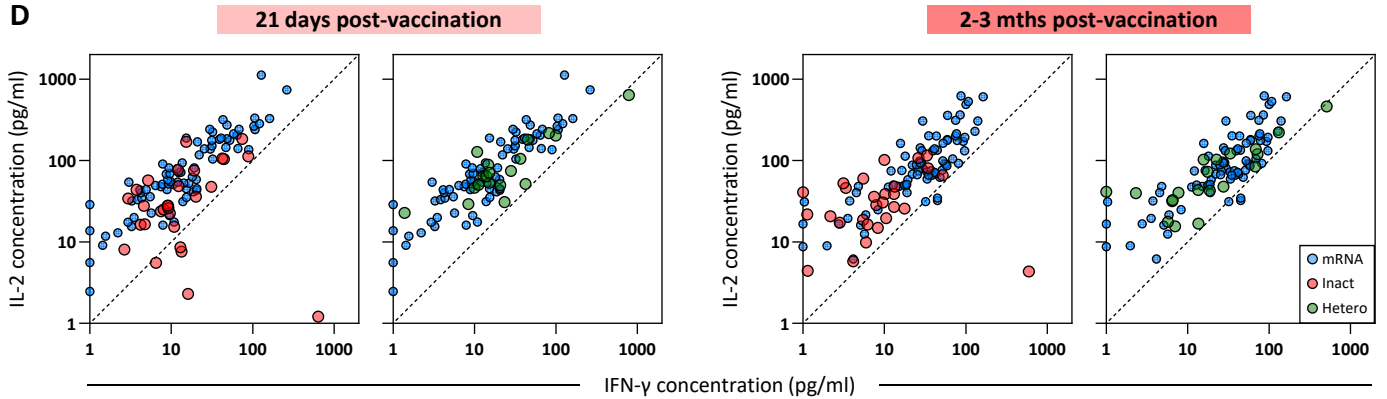

Figure 1

**A**

Spike overlapping peptide pools

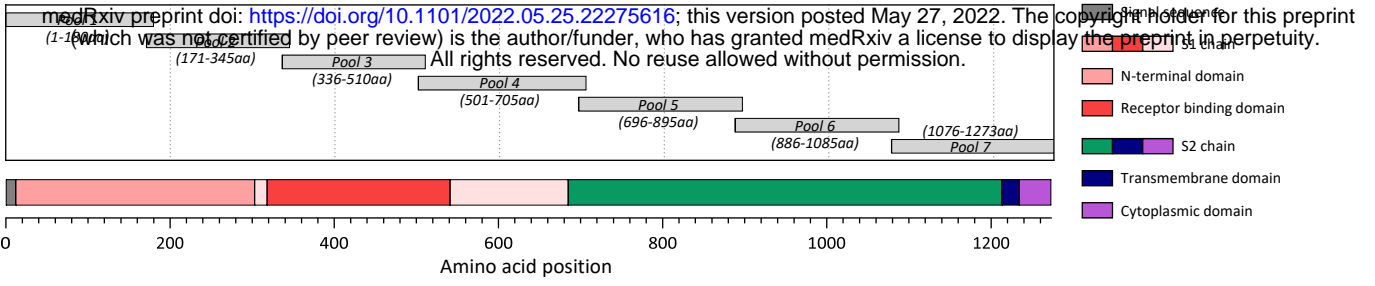

**B**

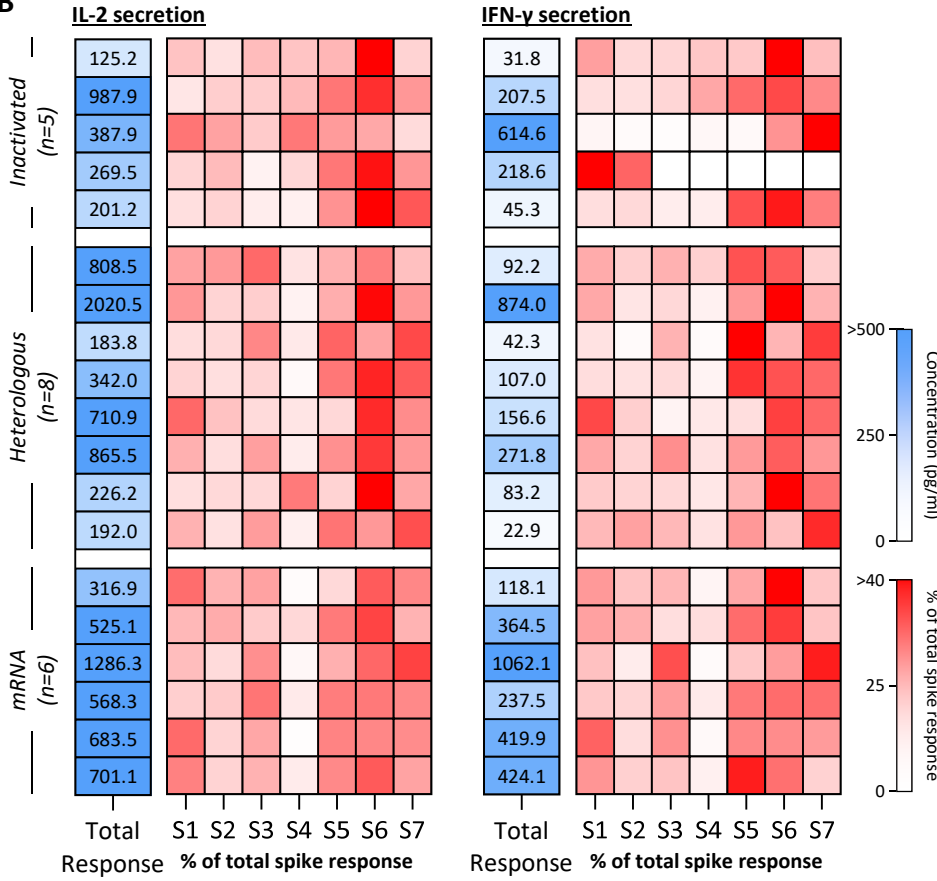

**C**

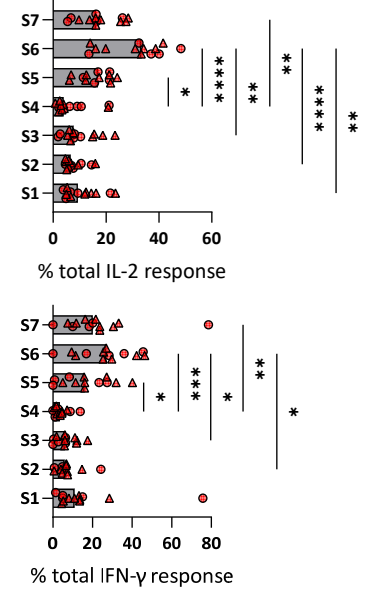

Figure 2

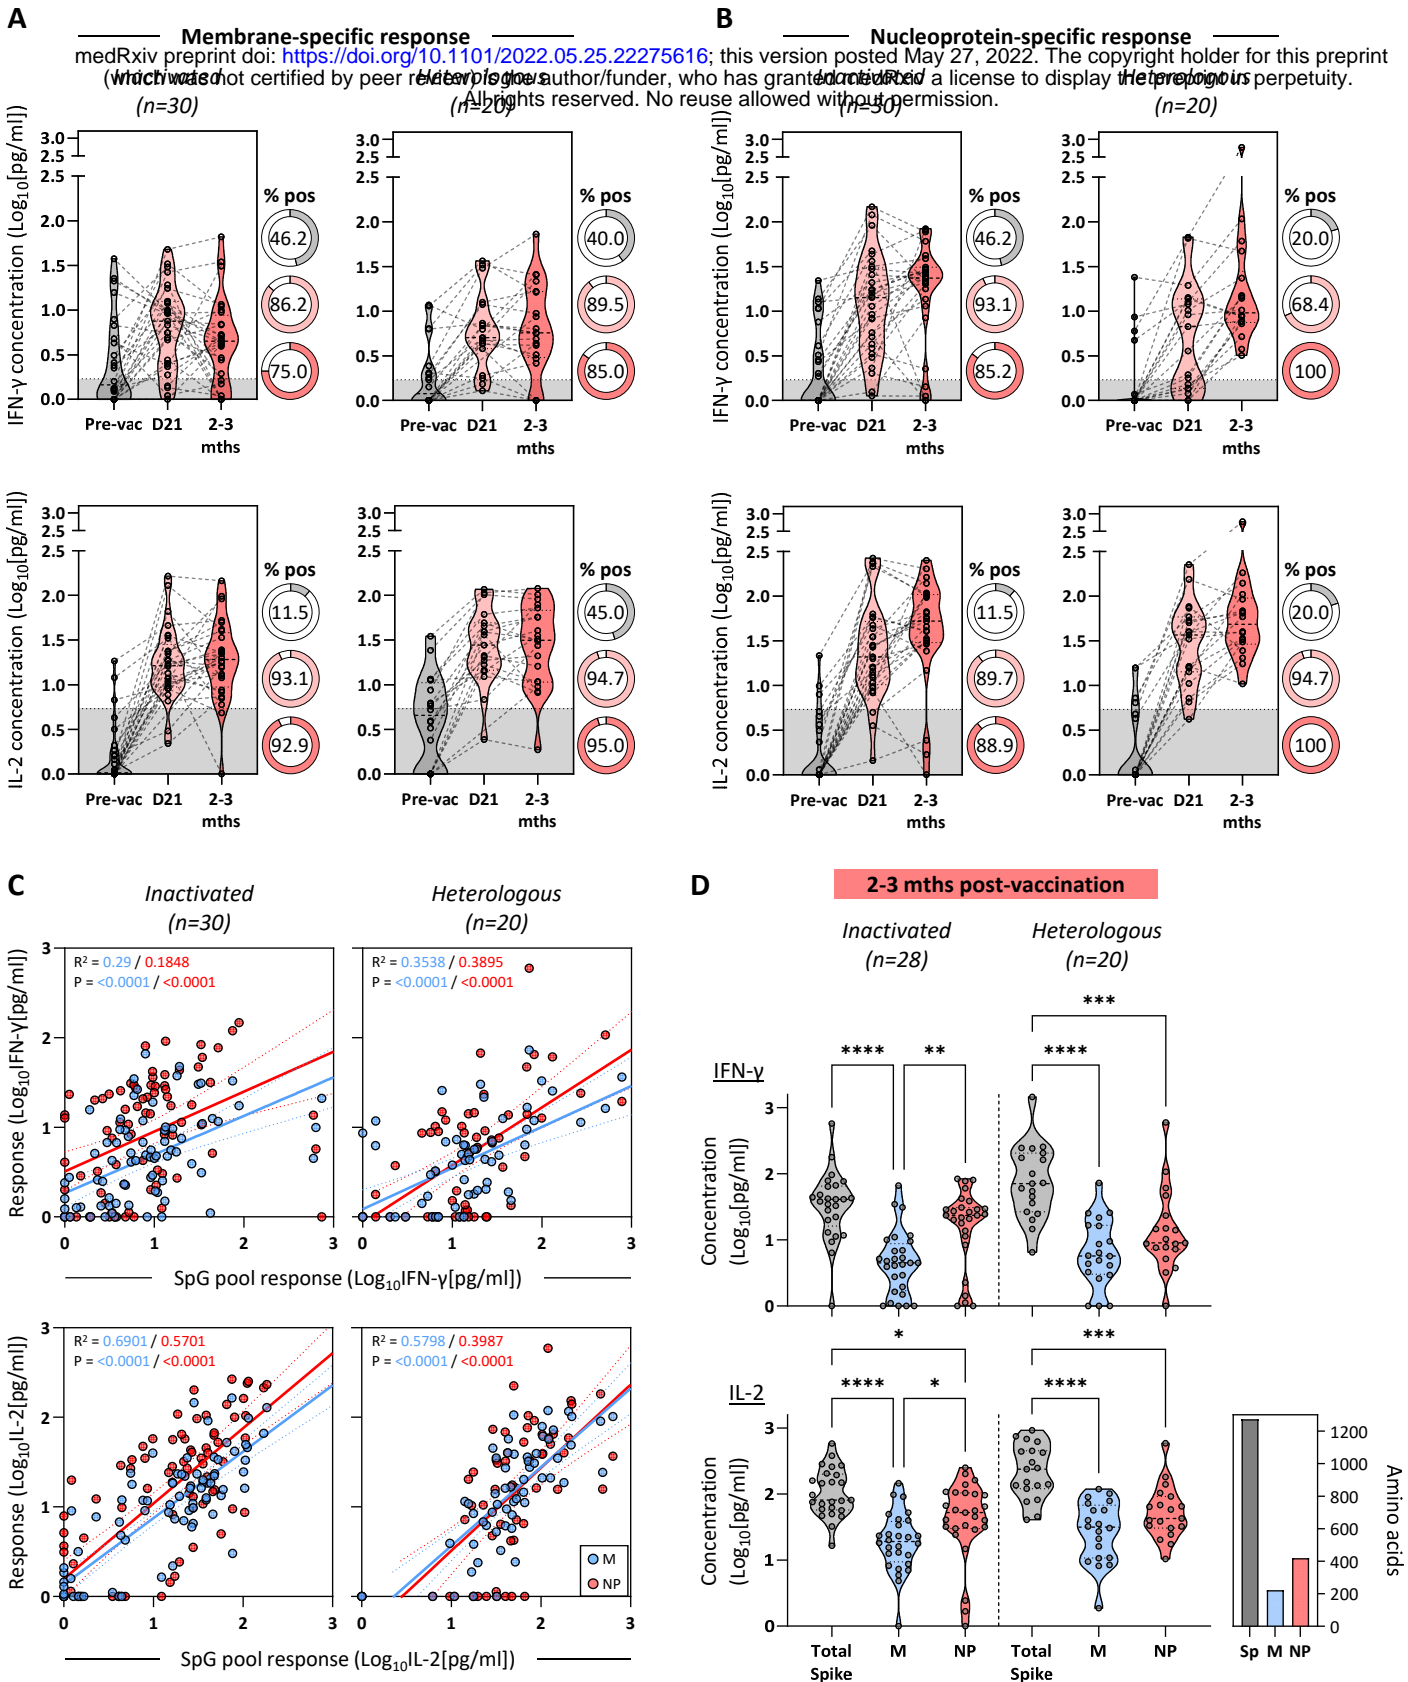

Figure 3



2-3 mths post-vaccination

medRxiv preprint doi: <https://doi.org/10.1101/2022.05.25.22275616>; this version posted May 27, 2022. The copyright holder for this preprint (which was not certified by peer review) is the author/funder, who has granted medRxiv a license to display the preprint in perpetuity. All rights reserved. No reuse allowed without permission.

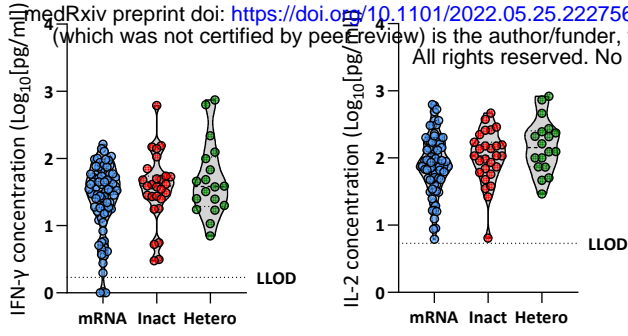

Figure 4

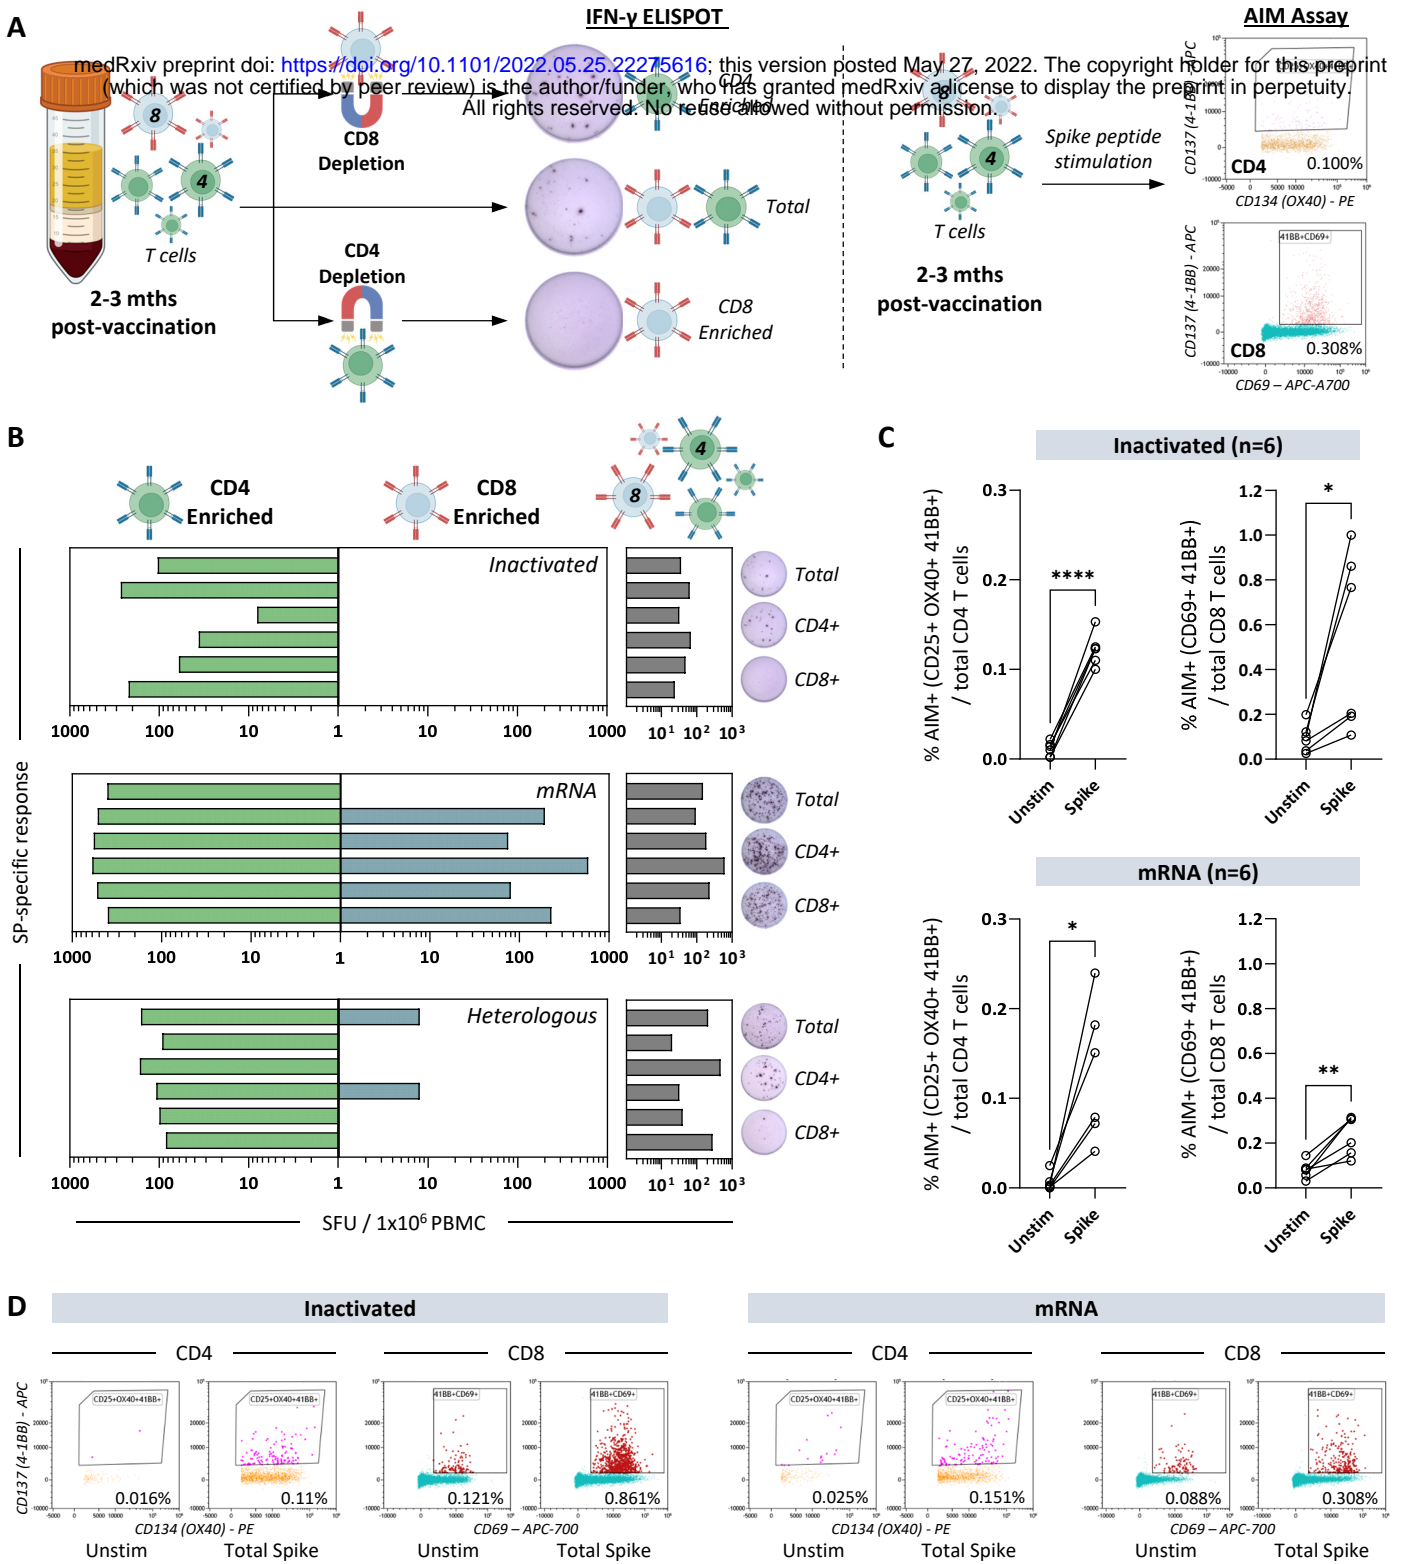

Figure 5

**A**

medRxiv preprint doi: <https://doi.org/10.1101/2022.05.25.22275616>; this version posted May 27, 2022. The copyright holder for this preprint (which was not certified by peer review) is the author/funder, who has granted medRxiv a license to display the preprint in perpetuity. All rights reserved. No reuse allowed without permission.

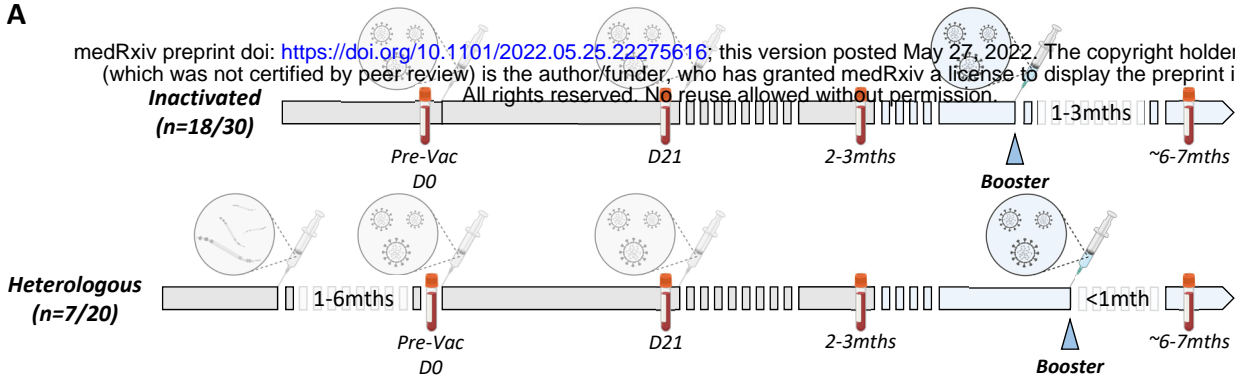**B**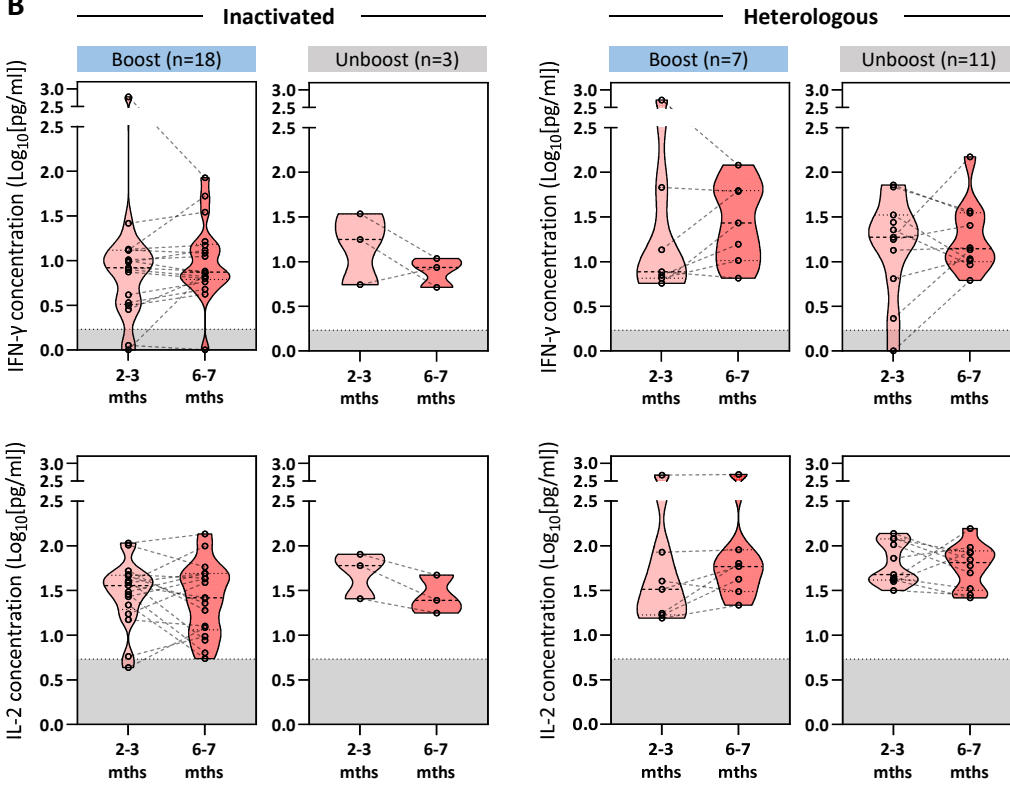**C**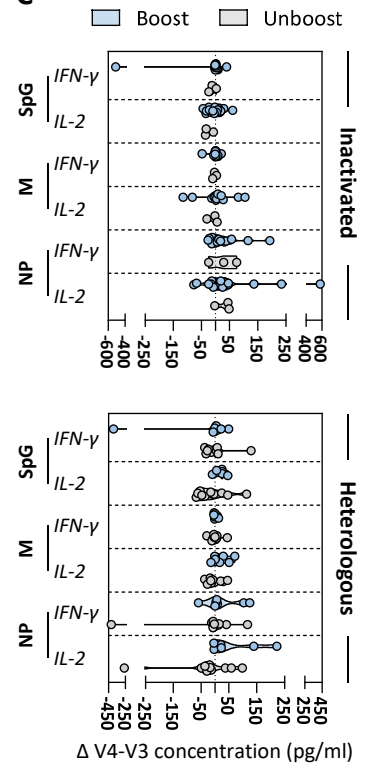

Figure 6

**A**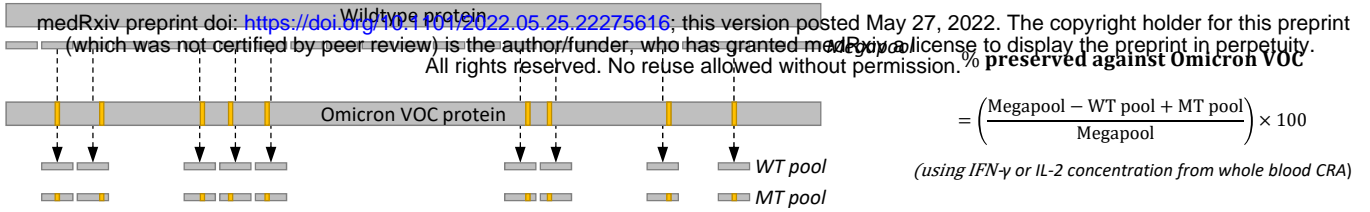**B**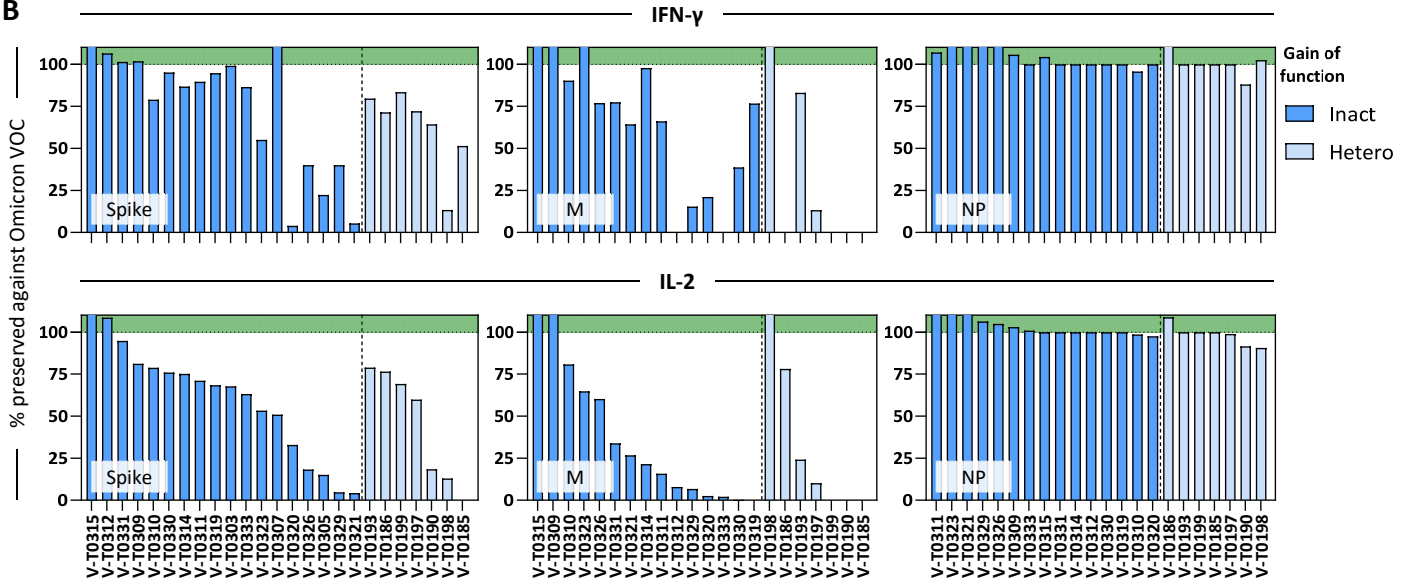**C**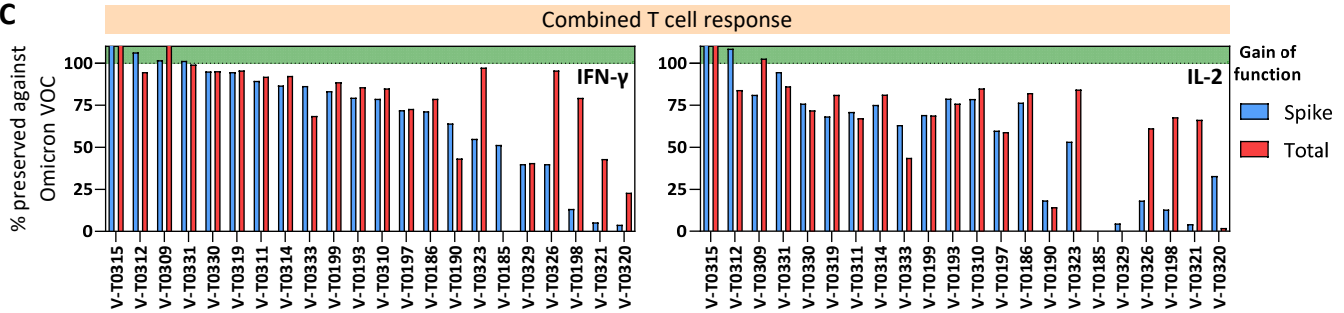

Figure 7

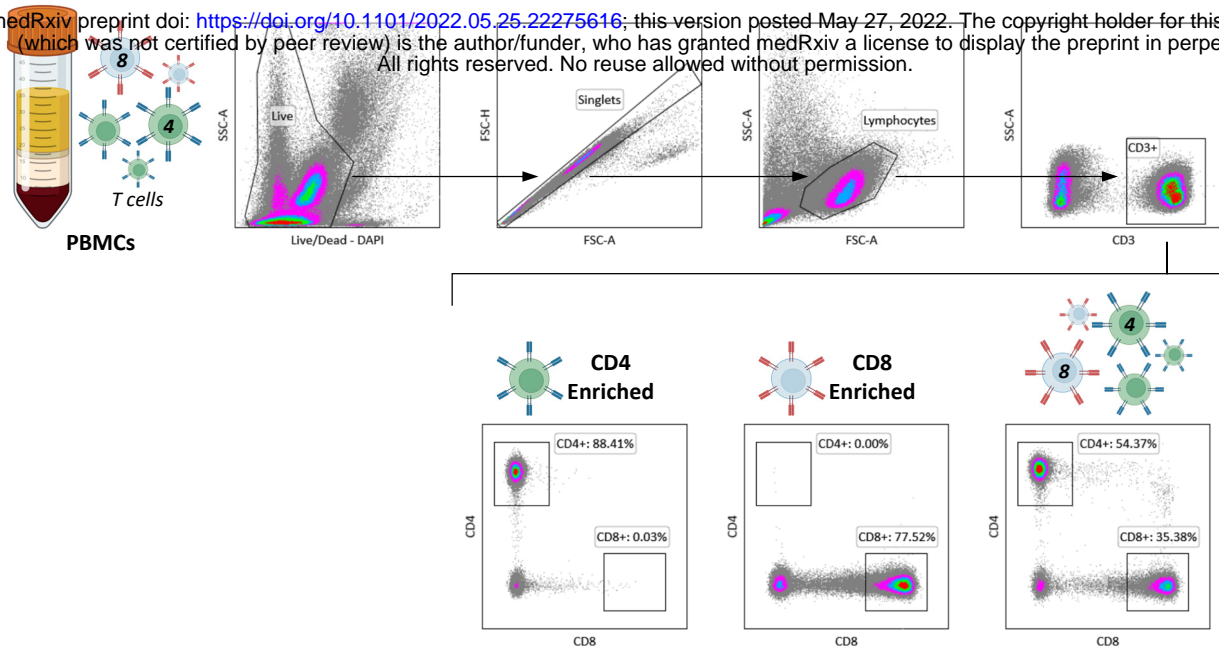

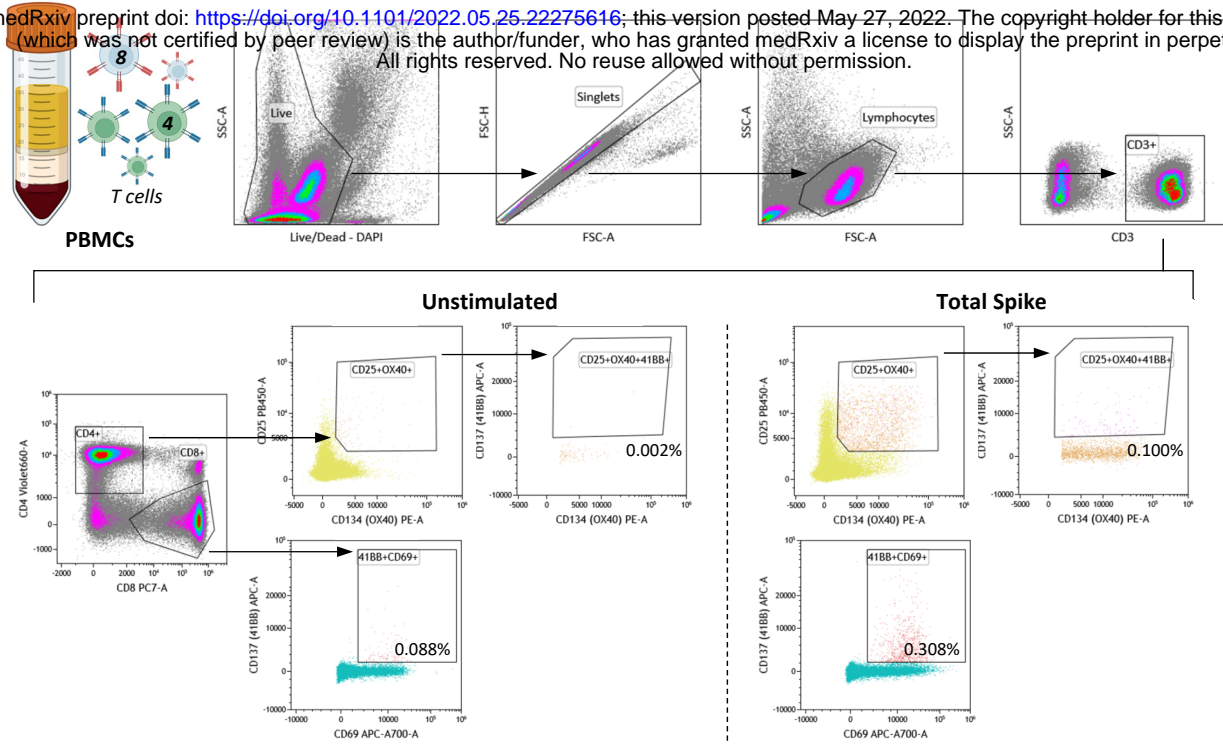

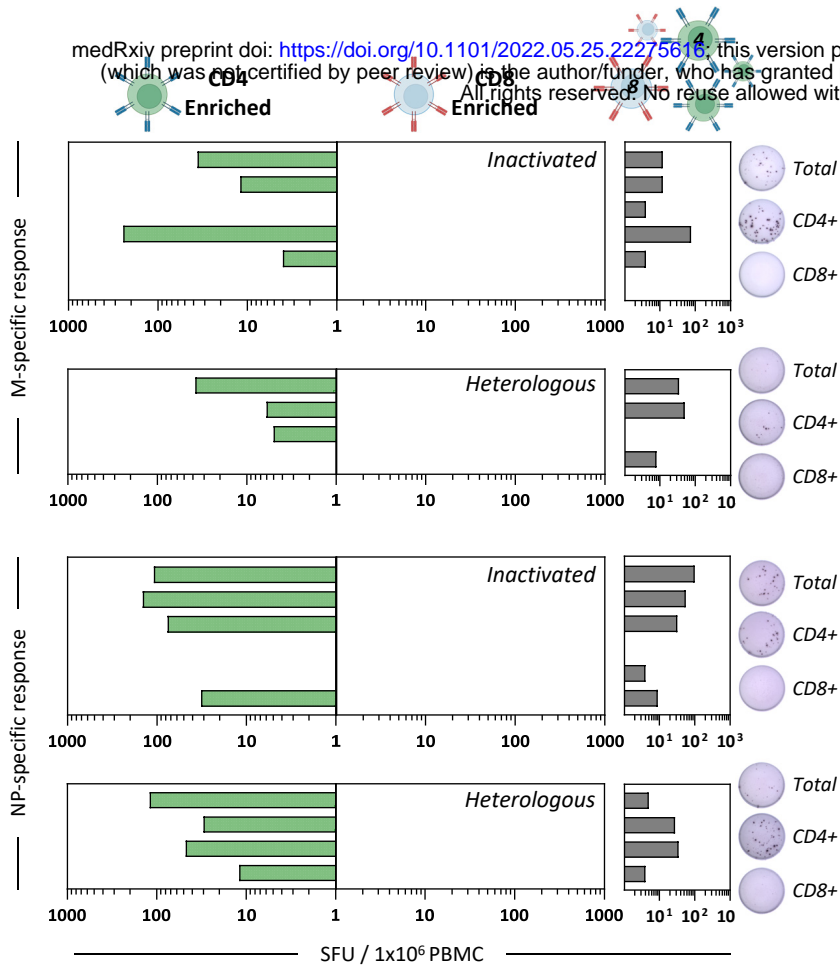

| Peptide Number | A.A Sequence    | A.A Position | Peptide Pool |              |
|----------------|-----------------|--------------|--------------|--------------|
| SP_1           | MFVFLVLLPLVSSQC | 1-15         |              | Spike pool 1 |
| SP_2           | VLLPLVSSQCVNLTT | 6-20         |              | Spike pool 1 |
| SP_3           | VSSQCVNLTRTQLP  | 11-25        |              | Spike pool 1 |
| SP_4           | VNLTRTQLPPAYTN  | 16-30        |              | Spike pool 1 |
| SP_5           | RTQLPPAYTNSFTRG | 21-35        |              | Spike pool 1 |
| SP_6           | PAYTNSFTRGVVYPD | 26-40        |              | Spike pool 1 |
| SP_7           | SFTRGVYYPDKVFRS | 31-45        |              | Spike pool 1 |
| SP_8           | VYYPDKVFRSSVLHS | 36-50        |              | Spike pool 1 |
| SP_9           | KVFRSSVLHSTQDLF | 41-55        |              | Spike pool 1 |
| SP_10          | SVLHSTQDLFLPFFS | 46-60        |              | Spike pool 1 |
| SP_11          | TQDLFLPFFSNVTWF | 51-65        |              | Spike pool 1 |
| SP_12          | LPFFSNVTWFHAIHV | 56-70        |              | Spike pool 1 |
| SP_13          | NVTWFHAIHVSQTNG | 61-75        |              | Spike pool 1 |
| SP_14          | HAIHVSQTNGTKRFD | 66-80        |              | Spike pool 1 |
| SP_15          | SGTNGTKRFDNPVLP | 71-85        |              | Spike pool 1 |
| SP_16          | TKRFDNPVLPFNDGV | 76-90        |              | Spike pool 1 |
| SP_17          | NPVLPFNDGVYFAST | 81-95        |              | Spike pool 1 |
| SP_18          | FNDGVYFASTKSNI  | 86-100       |              | Spike pool 1 |
| SP_19          | YFASTKSNIIRGWI  | 91-105       |              | Spike pool 1 |
| SP_20          | EKSNIIRGWIFGTTL | 96-110       |              | Spike pool 1 |
| SP_21          | IRGWIFGTTLDSKTQ | 101-115      | Spike gold   | Spike pool 1 |
| SP_22          | FGTTLDSKTQSLIV  | 106-120      | Spike gold   | Spike pool 1 |
| SP_23          | DSKTQSLIVNNATN  | 111-125      |              | Spike pool 1 |
| SP_24          | SLIVNNATNVVIKV  | 116-130      |              | Spike pool 1 |
| SP_25          | NNATNVVIKVCEQF  | 121-135      |              | Spike pool 1 |
| SP_26          | VVIKVCEQFCNDPF  | 126-140      |              | Spike pool 1 |
| SP_27          | CEQFCNDPFLGVYY  | 131-145      |              | Spike pool 1 |
| SP_28          | CNDPFLGVYYHKNK  | 136-150      |              | Spike pool 1 |
| SP_29          | LGVYYHKNKSWMES  | 141-155      |              | Spike pool 1 |
| SP_30          | HKNKSWMESEFRVY  | 146-160      |              | Spike pool 1 |
| SP_31          | SWMESEFRVYSSANN | 151-165      |              | Spike pool 1 |
| SP_32          | EFRVYSSANNCTFEY | 156-170      |              | Spike pool 1 |
| SP_33          | SSANNCTFEYVSQPF | 161-175      |              | Spike pool 1 |
| SP_34          | CTFEYVSQPFLMDLE | 166-180      | Spike gold   | Spike pool 1 |
| SP_35          | VSQPFLMDLEGKQGN | 171-185      | Spike gold   | Spike pool 2 |
| SP_36          | LMDLEGKQGNFKNLR | 176-190      |              | Spike pool 2 |
| SP_37          | GKQGNFKNLREFVFK | 181-195      |              | Spike pool 2 |
| SP_38          | FKNLREFVFKNIDGY | 186-200      |              | Spike pool 2 |
| SP_39          | EFVFKNIDGYFKIYS | 191-205      |              | Spike pool 2 |
| SP_40          | NIDGYFKIYSKHTPI | 196-210      |              | Spike pool 2 |
| SP_41          | FKIYSKHTPINLVRD | 201-215      |              | Spike pool 2 |
| SP_42          | KHTPINLVRDLPQGF | 206-220      |              | Spike pool 2 |
| SP_43          | NLVRDLPQGFSALEP | 211-225      |              | Spike pool 2 |
| SP_44          | LPQGFSALEPLVDLP | 216-230      |              | Spike pool 2 |
| SP_45          | SALEPLVDLPIGINI | 221-235      |              | Spike pool 2 |



|       |                  |         |            |              |
|-------|------------------|---------|------------|--------------|
| SP_46 | LVDLPIGINITRFQT  | 226-240 |            | Spike pool 2 |
| SP_47 | IGINITRFQTLALH   | 231-245 |            | Spike pool 2 |
| SP_48 | TRFQTLALHRSYLT   | 236-250 | Spike gold | Spike pool 2 |
| SP_49 | LLALHRSYLTPGDSS  | 241-255 | Spike gold | Spike pool 2 |
| SP_50 | RSYLTPGDSSSGWTA  | 246-260 | Spike gold | Spike pool 2 |
| SP_51 | PGDSSSGWTAGAAAY  | 251-265 |            | Spike pool 2 |
| SP_52 | SGWTAGAAAYVGYL   | 256-270 |            | Spike pool 2 |
| SP_53 | GAAAYVGYLQPRTF   | 261-275 |            | Spike pool 2 |
| SP_54 | YVGYLQPRTFLLKYN  | 266-280 |            | Spike pool 2 |
| SP_55 | QPRTFLLKYNENGTI  | 271-285 |            | Spike pool 2 |
| SP_56 | LLKYNENGTITDAVD  | 276-290 |            | Spike pool 2 |
| SP_57 | ENGTITDAVDCALDP  | 281-295 |            | Spike pool 2 |
| SP_58 | TDAVDCALDPLSETK  | 286-300 |            | Spike pool 2 |
| SP_59 | CALDPLSETKCTLS   | 291-305 | Spike gold | Spike pool 2 |
| SP_60 | LSETKCTLSFTVEK   | 296-310 | Spike gold | Spike pool 2 |
| SP_61 | CTLSFTVEKGIYQT   | 301-315 | Spike gold | Spike pool 2 |
| SP_62 | FTVEKGIYQTSNFRV  | 306-320 | Spike gold | Spike pool 2 |
| SP_63 | GIYQTSNFRVQPTES  | 311-325 | Spike gold | Spike pool 2 |
| SP_64 | SNFRVQPTESIVRFP  | 316-330 |            | Spike pool 2 |
| SP_65 | QPTESIVRFPNITNL  | 321-335 |            | Spike pool 2 |
| SP_66 | IVRFPNITNLCPFGE  | 326-340 |            | Spike pool 2 |
| SP_67 | NITNLCPFGEVFNAT  | 331-345 |            | Spike pool 2 |
| SP_68 | CPFGEVFNATRFASV  | 336-350 |            | Spike pool 3 |
| SP_69 | VFNATRFASVYAWNR  | 341-355 |            | Spike pool 3 |
| SP_70 | RFASVYAWNRKRISN  | 346-360 |            | Spike pool 3 |
| SP_71 | YAWNRKRISNCVADY  | 351-365 |            | Spike pool 3 |
| SP_72 | KRISNCVADYSVLYN  | 356-370 |            | Spike pool 3 |
| SP_73 | CVADYSVLYNSASF   | 361-375 |            | Spike pool 3 |
| SP_74 | SVLYNSASFSTFKCY  | 366-380 |            | Spike pool 3 |
| SP_75 | SASFSTFKCYGVSPT  | 371-385 | Spike gold | Spike pool 3 |
| SP_76 | TFKCYGVSPTKLNDL  | 376-390 | Spike gold | Spike pool 3 |
| SP_77 | GVSPTKLNDLCFTNV  | 381-395 |            | Spike pool 3 |
| SP_78 | KLNDLCFTNVYADSF  | 386-400 |            | Spike pool 3 |
| SP_79 | CFTNVYADSFVIRGD  | 391-405 |            | Spike pool 3 |
| SP_80 | YADSFVIRGDEVQRQI | 396-410 |            | Spike pool 3 |
| SP_81 | VIRGDEVQRQIAPGQT | 401-415 |            | Spike pool 3 |
| SP_82 | EVRQIAPGQTGKIAD  | 406-420 |            | Spike pool 3 |
| SP_83 | APGQTGKIADYNYKL  | 411-425 |            | Spike pool 3 |
| SP_84 | GKIADYNYKLPPDFT  | 416-430 |            | Spike pool 3 |
| SP_85 | YNYKLPPDFTGCVIA  | 421-435 | Spike gold | Spike pool 3 |
| SP_86 | PDDFTGCVIAWNSNN  | 426-440 |            | Spike pool 3 |
| SP_87 | GCVIAWNSNNLDSKV  | 431-445 |            | Spike pool 3 |
| SP_88 | WNSNNLDSKVGGNYN  | 436-450 | Spike gold | Spike pool 3 |
| SP_89 | LDSKVGGNYNLYRL   | 441-455 | Spike gold | Spike pool 3 |
| SP_90 | GGNYNLYRLFRKSN   | 446-460 | Spike gold | Spike pool 3 |
| SP_91 | YLYRLFRKSNLKPFE  | 451-465 | Spike gold | Spike pool 3 |

|        |                 |         |            |              |
|--------|-----------------|---------|------------|--------------|
| SP_92  | FRKSNLKPFERDIST | 456-470 | Spike gold | Spike pool 3 |
| SP_93  | LKPFERDISTEIYQA | 461-475 | Spike gold | Spike pool 3 |
| SP_94  | RDISTEIYQAGSTPC | 466-480 |            | Spike pool 3 |
| SP_95  | EIYQAGSTPCNGVEG | 471-485 |            | Spike pool 3 |
| SP_96  | GSTPCNGVEGFNCYF | 476-490 |            | Spike pool 3 |
| SP_97  | NGVEGFNCYFPLQSY | 481-495 |            | Spike pool 3 |
| SP_98  | FNCYFPLQSYGFQPT | 486-500 |            | Spike pool 3 |
| SP_99  | PLQSYGFQPTNGVGY | 491-505 |            | Spike pool 3 |
| SP_100 | GFQPTNGVGYQPYRV | 496-510 |            | Spike pool 3 |
| SP_101 | NGVGYQPYRVVLSF  | 501-515 |            | Spike pool 4 |
| SP_102 | QPYRVVLSFELLHA  | 506-520 |            | Spike pool 4 |
| SP_103 | VVLSFELLHAPATVC | 511-525 |            | Spike pool 4 |
| SP_104 | ELLHAPATVCGPKKS | 516-530 |            | Spike pool 4 |
| SP_105 | PATVCGPKKSTNLVK | 521-535 |            | Spike pool 4 |
| SP_106 | GPKKSTNLVKNKCVN | 526-540 | Spike gold | Spike pool 4 |
| SP_107 | TNLVKNKCVNFNFNG | 531-545 | Spike gold | Spike pool 4 |
| SP_108 | NKCVNFNFNGLTGTG | 536-550 |            | Spike pool 4 |
| SP_109 | FNFNGLTGTGVLTES | 541-555 | Spike gold | Spike pool 4 |
| SP_110 | LTGTGVLTESNKKFL | 546-560 | Spike gold | Spike pool 4 |
| SP_111 | VLTESNKKFLPFQQF | 551-565 |            | Spike pool 4 |
| SP_112 | NKKFLPFQQFGRDIA | 556-570 |            | Spike pool 4 |
| SP_113 | PFQQFGRDIADTTDA | 561-575 |            | Spike pool 4 |
| SP_114 | GRDIADTTDAVRDPQ | 566-580 |            | Spike pool 4 |
| SP_115 | DTTDAVRDPQTLEIL | 571-585 |            | Spike pool 4 |
| SP_116 | VRDPQTLEILDITPC | 576-590 |            | Spike pool 4 |
| SP_117 | TLEILDITPCSFGGV | 581-595 |            | Spike pool 4 |
| SP_118 | DITPCSFGGVSVITP | 586-600 |            | Spike pool 4 |
| SP_119 | SFGGVSVITPGTNTS | 591-605 |            | Spike pool 4 |
| SP_120 | SVITPGTNTSNQVAV | 596-610 |            | Spike pool 4 |
| SP_121 | GTNTSNQVAVLYQDV | 601-615 |            | Spike pool 4 |
| SP_122 | NQVAVLYQDVNCTEV | 606-620 |            | Spike pool 4 |
| SP_123 | LYQDVNCTEVPVAIH | 611-625 |            | Spike pool 4 |
| SP_124 | NCTEVPVAIHADQLT | 616-630 |            | Spike pool 4 |
| SP_125 | PVAIHADQLTPTWRV | 621-635 |            | Spike pool 4 |
| SP_126 | ADQLTPTWRVYSTGS | 626-640 |            | Spike pool 4 |
| SP_127 | PTWRVYSTGSNVFQT | 631-645 |            | Spike pool 4 |
| SP_128 | YSTGSNVFQTRAGCL | 636-650 |            | Spike pool 4 |
| SP_129 | NVFQTRAGCLIGAEH | 641-655 |            | Spike pool 4 |
| SP_130 | RAGCLIGAEHVNNSY | 646-660 | Spike gold | Spike pool 4 |
| SP_131 | IGAEHVNNSYECDIP | 651-665 | Spike gold | Spike pool 4 |
| SP_132 | VNNSYECDIPIGAGI | 656-670 |            | Spike pool 4 |
| SP_133 | ECDIPIGAGICASYQ | 661-675 |            | Spike pool 4 |
| SP_134 | IGAGICASYQTQTNS | 666-680 |            | Spike pool 4 |
| SP_135 | CASYQTQTNSPRRAR | 671-685 |            | Spike pool 4 |
| SP_136 | TQTNSPRRARSVASQ | 676-690 |            | Spike pool 4 |
| SP_137 | PRRARSVASQSIIAY | 681-695 |            | Spike pool 4 |

|        |                  |         |            |              |
|--------|------------------|---------|------------|--------------|
| SP_138 | SVASQSIAYTMSLG   | 686-700 | Spike gold | Spike pool 4 |
| SP_139 | SIIAYTMSLGAENSV  | 691-705 | Spike gold | Spike pool 4 |
| SP_140 | TMSLGAENSVAYSNN  | 696-710 | Spike gold | Spike pool 5 |
| SP_141 | AENSVAYSNNIAIP   | 701-715 |            | Spike pool 5 |
| SP_142 | AYSNNSIAIPTNFTI  | 706-720 |            | Spike pool 5 |
| SP_143 | SIAIPTNFTISVTTE  | 711-725 |            | Spike pool 5 |
| SP_144 | TNFTISVTTEILPVS  | 716-730 |            | Spike pool 5 |
| SP_145 | SVTTEILPVSMTKTS  | 721-735 |            | Spike pool 5 |
| SP_146 | ILPVSMTKTSVDCTM  | 726-740 |            | Spike pool 5 |
| SP_147 | MTKTSVDCTMYICGD  | 731-745 |            | Spike pool 5 |
| SP_148 | VDCTMYICGDSTEC   | 736-750 |            | Spike pool 5 |
| SP_149 | YICGDSTECNLLQ    | 741-755 |            | Spike pool 5 |
| SP_150 | STECNLLQYGSFC    | 746-760 | Spike gold | Spike pool 5 |
| SP_151 | NLLQYGSFCTQLNR   | 751-765 | Spike gold | Spike pool 5 |
| SP_152 | YGSFCTQLNRALTGI  | 756-770 |            | Spike pool 5 |
| SP_153 | TQLNRALTGIAVEQD  | 761-775 |            | Spike pool 5 |
| SP_154 | ALTGIAVEQDKNTQE  | 766-780 |            | Spike pool 5 |
| SP_155 | AVEQDKNTQEVFAQV  | 771-785 |            | Spike pool 5 |
| SP_156 | KNTQEVFAQVKQIYK  | 776-790 | Spike gold | Spike pool 5 |
| SP_157 | VFAQVKQIYKTPPIK  | 781-795 | Spike gold | Spike pool 5 |
| SP_158 | KQIYKTPPIKDFGGF  | 786-800 | Spike gold | Spike pool 5 |
| SP_159 | TPPIKDFGGFNFSQI  | 791-805 | Spike gold | Spike pool 5 |
| SP_160 | DFGGFNFSQILPDPS  | 796-810 |            | Spike pool 5 |
| SP_161 | NFSQILPDPSKPSKR  | 801-815 | Spike gold | Spike pool 5 |
| SP_162 | LPDPSKPSKRSFIED  | 806-820 |            | Spike pool 5 |
| SP_163 | KPSKRSFIEDLLFNK  | 811-825 |            | Spike pool 5 |
| SP_164 | SFIEDLLFNKVTLAD  | 816-830 |            | Spike pool 5 |
| SP_165 | LLFNKVTLADAGFIK  | 821-835 |            | Spike pool 5 |
| SP_166 | VTLADAGFIKQYGDC  | 826-840 |            | Spike pool 5 |
| SP_167 | AGFIKQYGDCLGDIA  | 831-845 | Spike gold | Spike pool 5 |
| SP_168 | QYGDCLGDIAARDLI  | 836-850 | Spike gold | Spike pool 5 |
| SP_169 | LGDIAARDLICAQKF  | 841-855 |            | Spike pool 5 |
| SP_170 | ARDLICAQKFNGLTV  | 846-860 |            | Spike pool 5 |
| SP_171 | CAQKFNGLTVLPPL   | 851-865 |            | Spike pool 5 |
| SP_172 | NGLTVLPPLTDEMI   | 856-870 |            | Spike pool 5 |
| SP_173 | LPPLTDEMIAQYTS   | 861-875 |            | Spike pool 5 |
| SP_174 | TDEMIAQYTSALLAG  | 866-880 |            | Spike pool 5 |
| SP_175 | AQYTSALLAGTITSG  | 871-885 |            | Spike pool 5 |
| SP_176 | ALLAGTITSGWTFGA  | 876-890 |            | Spike pool 5 |
| SP_177 | TITSGWTFGAGAAALQ | 881-895 |            | Spike pool 5 |
| SP_178 | WTFGAGAAALQIPFAM | 886-900 |            | Spike pool 6 |
| SP_179 | GAALQIPFAMQMAYR  | 891-905 | Spike gold | Spike pool 6 |
| SP_180 | IPFAMQMAYRFNGIG  | 896-910 |            | Spike pool 6 |
| SP_181 | QMAYRFNGIGVTQNV  | 901-915 | Spike gold | Spike pool 6 |
| SP_182 | FNGIGVTQNVLYENQ  | 906-920 | Spike gold | Spike pool 6 |
| SP_183 | VTQNVLYENQKLIAN  | 911-925 |            | Spike pool 6 |

|        |                 |           |            |              |
|--------|-----------------|-----------|------------|--------------|
| SP_184 | LYENQKLIANQFNSA | 916-930   |            | Spike pool 6 |
| SP_185 | KLIANQFNSAIGKIQ | 921-935   |            | Spike pool 6 |
| SP_186 | QFNSAIGKIQDSLSS | 926-940   |            | Spike pool 6 |
| SP_187 | IGKIQDSLSTASAL  | 931-945   |            | Spike pool 6 |
| SP_188 | DSLSTASALGKLQD  | 936-950   | Spike gold | Spike pool 6 |
| SP_189 | TASALGKLQDVVNQN | 941-955   | Spike gold | Spike pool 6 |
| SP_190 | GKLQDVVNQNAQALN | 946-960   |            | Spike pool 6 |
| SP_191 | VVNQNAQALNTLVKQ | 951-965   |            | Spike pool 6 |
| SP_192 | AQALNTLVKQLSSNF | 956-970   | Spike gold | Spike pool 6 |
| SP_193 | TLVKQLSSNFGAISS | 961-975   |            | Spike pool 6 |
| SP_194 | LSSNFGAISSVLNDI | 966-980   |            | Spike pool 6 |
| SP_195 | GAISSVLNDILSRLD | 971-985   |            | Spike pool 6 |
| SP_196 | VLNDILSRLDKVEAE | 976-990   | Spike gold | Spike pool 6 |
| SP_197 | LSRLDKVEAEVQIDR | 981-995   |            | Spike pool 6 |
| SP_198 | KVEAEVQIDRLITGR | 986-1000  |            | Spike pool 6 |
| SP_199 | VQIDRLITGRLQSLQ | 991-1005  |            | Spike pool 6 |
| SP_200 | LITGRLQSLQTYVTQ | 996-1010  | Spike gold | Spike pool 6 |
| SP_201 | LQSLQTYVTQQLIRA | 1001-1015 |            | Spike pool 6 |
| SP_202 | TYVTQQLIRAAEIRA | 1006-1020 |            | Spike pool 6 |
| SP_203 | QLIRAAEIRASANLA | 1011-1025 | Spike gold | Spike pool 6 |
| SP_204 | AEIRASANLAATKMS | 1016-1030 | Spike gold | Spike pool 6 |
| SP_205 | SANLAATKMSECVLG | 1021-1035 |            | Spike pool 6 |
| SP_206 | ATKMSECVLGQSKRV | 1026-1040 |            | Spike pool 6 |
| SP_207 | ECVLGQSKRVDFCGK | 1031-1045 |            | Spike pool 6 |
| SP_208 | QSKRVDFCGKGYHLM | 1036-1050 |            | Spike pool 6 |
| SP_209 | DFCGKGYHLMSFPQS | 1041-1055 |            | Spike pool 6 |
| SP_210 | GYHLMSFPQSAPHGV | 1046-1060 |            | Spike pool 6 |
| SP_211 | SFPQSAPHGVVFLHV | 1051-1065 |            | Spike pool 6 |
| SP_212 | APHGVVFLHVTVVPA | 1056-1070 | Spike gold | Spike pool 6 |
| SP_213 | VFLHVTVVPAQEKNF | 1061-1075 |            | Spike pool 6 |
| SP_214 | TVVPAQEKNFTTAPA | 1066-1080 |            | Spike pool 6 |
| SP_215 | QEKNFTTAPAICHDG | 1071-1085 |            | Spike pool 6 |
| SP_216 | TTAPAICHDGKAHFP | 1076-1090 |            | Spike pool 7 |
| SP_217 | ICHDGKAHFPREGVF | 1081-1095 |            | Spike pool 7 |
| SP_218 | KAHFPREGVFVSNGT | 1086-1100 |            | Spike pool 7 |
| SP_219 | REGVFVSNGTHWFVT | 1091-1105 |            | Spike pool 7 |
| SP_220 | VSNGTHWFVTQRNFY | 1096-1110 |            | Spike pool 7 |
| SP_221 | HWFVTQRNFYEPQII | 1101-1115 | Spike gold | Spike pool 7 |
| SP_222 | QRNFYEPQIITDNT  | 1106-1120 |            | Spike pool 7 |
| SP_223 | EPQIITDNTFVSGN  | 1111-1125 |            | Spike pool 7 |
| SP_224 | TTDNTFVSGNCDVVI | 1116-1130 |            | Spike pool 7 |
| SP_225 | FVSGNCDVVIGIVNN | 1121-1135 |            | Spike pool 7 |
| SP_226 | CDVVIGIVNNTVYDP | 1126-1140 |            | Spike pool 7 |
| SP_227 | GIVNNTVYDPLQPEL | 1131-1145 |            | Spike pool 7 |
| SP_228 | TVYDPLQPELDSFKE | 1136-1150 |            | Spike pool 7 |
| SP_229 | LQPELDSFKEELDKY | 1141-1155 |            | Spike pool 7 |

|        |                 |           |            |              |
|--------|-----------------|-----------|------------|--------------|
| SP_230 | DSFKEELDKYFKNHT | 1146-1160 |            | Spike pool 7 |
| SP_231 | ELDKYFKNHTSPDVD | 1151-1165 |            | Spike pool 7 |
| SP_232 | FKNHTSPDVDLGDIS | 1156-1170 |            | Spike pool 7 |
| SP_233 | SPDVDLGDISGINAS | 1161-1175 |            | Spike pool 7 |
| SP_234 | LGDISGINASVVNIQ | 1166-1180 |            | Spike pool 7 |
| SP_235 | GINASVVNIQKEIDR | 1171-1185 |            | Spike pool 7 |
| SP_236 | VVNIQKEIDRLNEVA | 1176-1190 |            | Spike pool 7 |
| SP_237 | KEIDRLNEVAKNLNE | 1181-1195 | Spike gold | Spike pool 7 |
| SP_238 | LNEVAKNLNESLIDL | 1186-1200 | Spike gold | Spike pool 7 |
| SP_239 | KNLNESLIDLQELGK | 1191-1205 | Spike gold | Spike pool 7 |
| SP_240 | SLIDLQELGKYEQYI | 1196-1210 |            | Spike pool 7 |
| SP_241 | QELGKYEQYIKWPWY | 1201-1215 |            | Spike pool 7 |
| SP_242 | YEQYIKWPWYIWLGF | 1206-1220 |            | Spike pool 7 |
| SP_243 | KWPWYIWLGFIAGLI | 1211-1225 |            | Spike pool 7 |
| SP_244 | IWLGFIAGLIAIVMV | 1216-1230 | Spike gold | Spike pool 7 |
| SP_245 | IAGLIAIVMVTIMLC | 1221-1235 |            | Spike pool 7 |
| SP_246 | AIVMVTIMLCCMTSC | 1226-1240 |            | Spike pool 7 |
| SP_247 | TIMLCCMTSCCCLK  | 1231-1245 |            | Spike pool 7 |
| SP_248 | CMTSCCCLKGCCSC  | 1236-1250 |            | Spike pool 7 |
| SP_249 | CCLKGCCSCGSCCK  | 1241-1255 |            | Spike pool 7 |
| SP_250 | GCCSCGSCCKFDEDD | 1246-1260 |            | Spike pool 7 |
| SP_251 | GSCCKFDEDDSEPV  | 1251-1265 |            | Spike pool 7 |
| SP_252 | FDEDDSEPVKGVKL  | 1256-1270 |            | Spike pool 7 |
| SP_253 | SEPVKGVKLHYT    | 1261-1273 |            | Spike pool 7 |

| Peptide Number | A.A Sequence     | A.A Position | Peptide pool |
|----------------|------------------|--------------|--------------|
| M_1            | MADSNGTITVEELKK  | 1-15         | M            |
| M_2            | GTITVEELKKLLEQW  | 6-20         | M            |
| M_3            | EELKKLLEQWNLVIG  | 11-25        | M            |
| M_4            | LLEQWNLVIGFLFLT  | 16-30        | M            |
| M_5            | NLVIGFLFLTWICLL  | 21-35        | M            |
| M_6            | FLFLTWICLLQFAYA  | 26-40        | M            |
| M_7            | WICLLQFAYANRRNF  | 31-45        | M            |
| M_8            | QFAYANRRNFLYIIK  | 36-50        | M            |
| M_9            | NRNFLYIIKLIFLW   | 41-55        | M            |
| M_10           | LYIIKLIFLWLLWPV  | 46-60        | M            |
| M_11           | LIFLWLLWPVTLACF  | 51-65        | M            |
| M_12           | LLWPVTLACFVLA AV | 56-70        | M            |
| M_13           | TLACFVLA AVYRINW | 61-75        | M            |
| M_14           | VLA AVYRINWITGGI | 66-80        | M            |
| M_15           | YRINWITGGIAIAMA  | 71-85        | M            |
| M_16           | ITGGIAIAMA CLVGL | 76-90        | M            |
| M_17           | AIAMA CLVGLMWLSY | 81-95        | M            |
| M_18           | CLVGLMWLSYFIASF  | 86-100       | M            |
| M_19           | MWLSYFIASFRLFAR  | 91-105       | M            |
| M_20           | FIASFRLFARTRSMW  | 96-110       | M            |
| M_21           | RLFARTRSMW SFNPE | 101-115      | M            |
| M_22           | TRSMW SFNPETNILL | 106-120      | M            |
| M_23           | SFNPETNILLNVPLH  | 111-125      | M            |
| M_24           | TNILLNVPLHGTILT  | 116-130      | M            |
| M_25           | NVPLHGTILTRP LLE | 121-135      | M            |
| M_26           | GTILTRP LLESELVI | 126-140      | M            |
| M_27           | RP LLESELVIGAVIL | 131-145      | M            |
| M_28           | SELVIGAVILRGHLR  | 136-150      | M            |
| M_29           | GAVILRGHLRIAGHH  | 141-155      | M            |
| M_30           | RGHLRIAGHH LGRCD | 146-160      | M            |
| M_31           | IAGHH LGRCDIKDLP | 151-165      | M            |
| M_32           | LGRCDIKDLPKEITV  | 156-170      | M            |
| M_33           | IKDLPKEITVATSRT  | 161-175      | M            |
| M_34           | KEITVATSRTL SYYK | 166-180      | M            |
| M_35           | ATSRTL SYYKLGASQ | 171-185      | M            |
| M_36           | LSYYKLGASQRVAGD  | 176-190      | M            |
| M_37           | LGASQRVAGDSGFAA  | 181-195      | M            |
| M_38           | RVAGDSGFAA SRYR  | 186-200      | M            |
| M_39           | SGFAA SRYRIGNYK  | 191-205      | M            |
| M_40           | YSRYRIGNYKLNTDH  | 196-210      | M            |
| M_41           | IGNYKLNTDHSSSSD  | 201-215      | M            |
| M_42           | LNTDHSSSSDNIALL  | 206-220      | M            |
| M_43           | SSSSDNIALLVQ     | 211-222      | M            |

| Peptide Number | A.A Sequence     | A.A Position | Peptide Pool |
|----------------|------------------|--------------|--------------|
| NP_1           | MSDNGPQNQRNAPRI  | 1-15         | NP1          |
| NP_2           | PQNQRNAPRITFGGP  | 6-20         | NP1          |
| NP_3           | NAPRITFGG PSDSTG | 11-25        | NP1          |
| NP_4           | TFGG PSDSTGSNQNG | 16-30        | NP1          |
| NP_5           | SDSTGSNQNGERSGA  | 21-35        | NP1          |
| NP_6           | SNQNGERSGARSKQR  | 26-40        | NP1          |
| NP_7           | ERSGARSKQRRPQGL  | 31-45        | NP1          |
| NP_8           | RSKQRRPQGLPNNTA  | 36-50        | NP1          |
| NP_9           | RPQGLPNNTASWFTA  | 41-55        | NP1          |
| NP_10          | PNNTASWFTALTQHG  | 46-60        | NP1          |
| NP_11          | SWFTALTQHGKEDLK  | 51-65        | NP1          |
| NP_12          | LTQHGKEDLKFPRGQ  | 56-70        | NP1          |
| NP_13          | KEDLKFPRGQGV PIN | 61-75        | NP1          |
| NP_14          | FPRGQGV PINTNSSP | 66-80        | NP1          |
| NP_15          | GV PINTNSSPDDQIG | 71-85        | NP1          |
| NP_16          | TNSSPDDQIGYYRRA  | 76-90        | NP1          |
| NP_17          | DDQIGYYRRATRRIR  | 81-95        | NP1          |
| NP_18          | YYRRATRRIRGGDGK  | 86-100       | NP1          |
| NP_19          | TRRIRGGDGKMKDLS  | 91-105       | NP1          |
| NP_20          | GGDGKMKDLSPRWYF  | 96-110       | NP1          |
| NP_21          | MKDLSPRWYFY YLGT | 101-115      | NP1          |
| NP_22          | PRWYFY YLGTGPEAG | 106-120      | NP1          |
| NP_23          | YYLGTGPEAGLPYGA  | 111-125      | NP1          |
| NP_24          | GPEAGLPYGANKDGI  | 116-130      | NP1          |
| NP_25          | LPYGANKDGIWVAT   | 121-135      | NP1          |
| NP_26          | NKDGIWVATEGALN   | 126-140      | NP1          |
| NP_27          | IWVATEGALNTPKDH  | 131-145      | NP1          |
| NP_28          | EGALNTPKDHIGTRN  | 136-150      | NP1          |
| NP_29          | TPKDHIGTRNPANNA  | 141-155      | NP1          |
| NP_30          | IGTRNPANNAIVLQ   | 146-160      | NP1          |
| NP_31          | PANNAIVLQLPQGT   | 151-165      | NP1          |
| NP_32          | AIVLQLPQGTTLPKG  | 156-170      | NP1          |
| NP_33          | LPQGTTL PKGFYAEG | 161-175      | NP1          |
| NP_34          | TLPKGFYAEGSRGGS  | 166-180      | NP1          |
| NP_35          | FYAEGSRGGSQASSR  | 171-185      | NP1          |
| NP_36          | SRGGSQASSRSSRS   | 176-190      | NP1          |
| NP_37          | QASSRSSRSRNSSR   | 181-195      | NP1          |
| NP_38          | SSRSRNSSRNSTPG   | 186-200      | NP1          |
| NP_39          | RNSSRNSTPGSSRGT  | 191-205      | NP1          |
| NP_40          | NSTPGSSRGTSPARM  | 196-210      | NP1          |
| NP_41          | SSRGTSPARMAGNGG  | 201-215      | NP1          |
| NP_42          | SPARMAGNGGDAALA  | 206-220      | NP2          |
| NP_43          | AGNGGDAALALLLD   | 211-225      | NP2          |
| NP_44          | DAALALLLDRLNQL   | 216-230      | NP2          |
| NP_45          | LLLDRLNQLESKMS   | 221-235      | NP2          |

|       |                 |         |     |
|-------|-----------------|---------|-----|
| NP_46 | RLNQLESKMSGKGQQ | 226-240 | NP2 |
| NP_47 | ESKMSGKGQQQQGQT | 231-245 | NP2 |
| NP_48 | GKGQQQQGQTVTKKS | 236-250 | NP2 |
| NP_49 | QQGQTVTKKSAAEAS | 241-255 | NP2 |
| NP_50 | VTKKSAAEASKKPRQ | 246-260 | NP2 |
| NP_51 | AAEASKKPRQKRTAT | 251-265 | NP2 |
| NP_52 | KKPRQKRTATKAYNV | 256-270 | NP2 |
| NP_53 | KRTATKAYNVTQAFG | 261-275 | NP2 |
| NP_54 | KAYNVTQAFGRRGPE | 266-280 | NP2 |
| NP_55 | TQAFGRRGPEQTQGN | 271-285 | NP2 |
| NP_56 | RRGPEQTQGNFGDQE | 276-290 | NP2 |
| NP_57 | QTQGNFGDQELIRQG | 281-295 | NP2 |
| NP_58 | FGDQELIRQGTDYKH | 286-300 | NP2 |
| NP_59 | LIRQGTDYKHWPQIA | 291-305 | NP2 |
| NP_60 | TDYKHWPQIAQFAPS | 296-310 | NP2 |
| NP_61 | WPQIAQFAPSASAFF | 301-315 | NP2 |
| NP_62 | QFAPSASAFFGMSRI | 306-320 | NP2 |
| NP_63 | ASAFFGMSRIGMEVT | 311-325 | NP2 |
| NP_64 | GMSRIGMEVTPSGTW | 316-330 | NP2 |
| NP_65 | GMEVTPSGTWLTYTG | 321-335 | NP2 |
| NP_66 | PSGTWLTGTGAIKLD | 326-340 | NP2 |
| NP_67 | LTYTGAIKLDDKDPN | 331-345 | NP2 |
| NP_68 | AIKLDDKDPNFKDQV | 336-350 | NP2 |
| NP_69 | DKDPNFKDQVILLNK | 341-355 | NP2 |
| NP_70 | FKDQVILLNKHIDAY | 346-360 | NP2 |
| NP_71 | ILLNKHIDAYKTFPP | 351-365 | NP2 |
| NP_72 | HIDAYKTFPPTPKK  | 356-370 | NP2 |
| NP_73 | KTFPPTPKKDKKKK  | 361-375 | NP2 |
| NP_74 | TEPKKDKKKKADETQ | 366-380 | NP2 |
| NP_75 | DKKKKADETQALPQR | 371-385 | NP2 |
| NP_76 | ADETQALPQRQKKQQ | 376-390 | NP2 |
| NP_77 | ALPQRQKKQQVTLL  | 381-395 | NP2 |
| NP_78 | QKKQQVTLLPAADL  | 386-400 | NP2 |
| NP_79 | TVTLLPAADLDDFSK | 391-405 | NP2 |
| NP_80 | PAADLDDFSKQLQQS | 396-410 | NP2 |
| NP_81 | DDFSKQLQQSMSSAD | 401-415 | NP2 |
| NP_82 | QLQQSMSSADSTQA  | 406-419 | NP2 |



| Protein | Peptide Number(Ancestral) | Ancestral A.A Position | Mutation                      | Ancestral A.A Sequence | Variant A.A Sequence   |
|---------|---------------------------|------------------------|-------------------------------|------------------------|------------------------|
| Spike   | SP_12                     | 56-70                  | A67V/DEL69-70                 | LPFFSNVTWFHAIHV        | LPFFSNVTWFHVISG        |
| Spike   | SP_13                     | 61-75                  | A67V/DEL69-70                 | NVTWFHAIHVSNGTNG       | NVTWFHVISGNTGK         |
| Spike   | SP_14                     | 66-80                  | A67V/DEL69-70                 | HAIHVSNGTNGTKRFD       | HVISGNTGTKRFDNP        |
| Spike   | SP_17                     | 81-95                  | T95I                          | NPVLPFNDGVYFAST        | NPVLPFNDGVYFASI        |
| Spike   | SP_18                     | 86-100                 | T95I                          | FNDGVYFASTEKSN         | FNDGVYFASIEKSN         |
| Spike   | SP_19                     | 91-105                 | T95I                          | YFASTEKSNIRGWI         | YFASIEKSNIRGWI         |
| Spike   | SP_27                     | 131-145                | G142D/DEL143-145              | CEQFCNDPFLGVYY         | CEQFCNDPFLDHKN         |
| Spike   | SP_28                     | 136-150                | G142D/DEL143-145              | CNDPFLGVYYHKNNK        | CNDPFLDHKNNKSWM        |
| Spike   | SP_29                     | 141-155                | G142D/DEL143-145              | LGVYYHKNNKSWMES        | LDHKNNKSWMESEFR        |
| Spike   | SP_41                     | 201-215                | N211I/DEL212/ins214EPE        | FKIYSKHTPINLVRD        | FKIYSKHTPIIVEPE        |
| Spike   | SP_42                     | 206-220                | N211I/DEL212/ins214EPE        | KHTPINLVRDLRDLQGF      | KHTPIIVEPERDLRDLQ      |
| Spike   | SP_43                     | 211-225                | N211I/DEL212/ins214EPE        | NLVRDLRDLRDLQGFSALEP   | IVEPERDLRDLRDLQGFSALEP |
| Spike   | SP_66                     | 326-340                | G339D                         | IVRFPNITNLCPFGE        | IVRFPNITNLCPFDE        |
| Spike   | SP_67                     | 331-345                | G339D                         | NITNLCPFGEVFNAT        | NITNLCPFDEVFNAT        |
| Spike   | SP_68                     | 336-350                | G339D                         | CPFGEVFNATRFASV        | CPFDEVFNATRFASV        |
| Spike   | SP_73                     | 361-375                | S371L/S373P/S375F             | CVADYSVLVNSASF         | CVADYSVLVNLAPFF        |
| Spike   | SP_74                     | 366-380                | S371L/S373P/S375F             | SVLVNSASFSTFKCY        | SVLVNLAPFFSTFKCY       |
| Spike   | SP_75                     | 371-385                | S371L/S373P/S375F             | SASFSTFKCYGVSP         | LAPFFSTFKCYGVSP        |
| Spike   | SP_82                     | 406-420                | K417N                         | EVRQIAPGQTGKIAD        | EVRQIAPGQTGNIA         |
| Spike   | SP_83                     | 411-425                | K417N                         | APGQTGKIADYNYKL        | APGQTGNIAADYNYKL       |
| Spike   | SP_84                     | 416-430                | K417N                         | GKIADYNYKLPPDFT        | GNIAADYNYKLPPDFT       |
| Spike   | SP_86                     | 426-440                | N440K                         | PDDFTGCVIAWNSNN        | PDDFTGCVIAWNSNK        |
| Spike   | SP_87                     | 431-445                | N440K                         | GCVIAWNSNNLDSKV        | GCVIAWNSNKLDSKV        |
| Spike   | SP_88                     | 436-450                | N440K/G446S                   | WNSNNLDSKVGNGYN        | WNSNKLDSKVSNGYN        |
| Spike   | SP_89                     | 441-455                | G446S                         | LDSKVGNGYNYLRL         | LDSKVSNGYNYLRL         |
| Spike   | SP_90                     | 446-460                | G446S                         | GGNYNYLRLFRKSN         | SGNYNYLRLFRKSN         |
| Spike   | SP_94                     | 466-480                | S477N/T478K                   | RDISTEIQAGSTPC         | RDISTEIQAGNKPC         |
| Spike   | SP_95                     | 471-485                | S477N/T478K/E484A             | EIQAGSTPCNGVEG         | EIQAGNKPCNGVAG         |
| Spike   | SP_96                     | 476-490                | S477N/T478K/E484A             | GSTPCNGVEGFNCYF        | GNKPCNGVAGFNCFY        |
| Spike   | SP_97                     | 481-495                | E484A/Q493R/                  | NGVEGFNCYFPLQSY        | NGVAGFNCFYPLRSY        |
| Spike   | SP_98                     | 486-500                | Q493R/G496S/Q498R             | FNCYFPLQSYGFQPT        | FNCYFPLRSYSFRPT        |
| Spike   | SP_99                     | 491-505                | Q493R/G496S/Q498R/N501Y/Y505H | PLQSYGFQPTNGVGY        | PLRSYSFRPTYGVGH        |
| Spike   | SP_100                    | 496-510                | G496S/Q498R/N501Y/Y505H       | GFQPTNGVGYQPYRV        | SFRPTYGVGHQPYRV        |
| Spike   | SP_101                    | 501-515                | N501Y/Y505H                   | NGVGYQPYRVVLSF         | YGVGHQPYRVVLSF         |
| Spike   | SP_108                    | 536-550                | T547K                         | NKCVNFNFLGTGTG         | NKCVNFNFLKGTGTG        |
| Spike   | SP_109                    | 541-555                | T547K                         | FNFNLTGTGVLTE          | FNFNLTGTGVLTE          |
| Spike   | SP_110                    | 546-560                | T547K                         | LTGTGVLTESNKFL         | LKGTGVLTESNKFL         |
| Spike   | SP_121                    | 601-615                | D614G                         | GTNTSNQVAVLYQDV        | GTNTSNQVAVLYQGV        |
| Spike   | SP_122                    | 606-620                | D614G                         | NQVAVLYQDVNCTEV        | NQVAVLYQGVNCTEV        |
| Spike   | SP_123                    | 611-625                | D614G                         | LYQDVNCTEVPVAIH        | LYQGVNCTEVPVAIH        |
| Spike   | SP_129                    | 641-655                | H655Y                         | NVFQTRAGCLIGAEH        | NVFQTRAGCLIGAEY        |
| Spike   | SP_130                    | 646-660                | H655Y                         | RAGCLIGAEHVNSY         | RAGCLIGAEYVNSY         |
| Spike   | SP_131                    | 651-665                | H655Y                         | IGAEHVNSYECIDIP        | IGAEYVNSYECIDIP        |
| Spike   | SP_134                    | 666-680                | N679K                         | IGAGICASYQTQNS         | IGAGICASYQTQKS         |
| Spike   | SP_135                    | 671-685                | N679K/P681H                   | CASYQTQNSPRRAR         | CASYQTQTKSHRRAR        |
| Spike   | SP_136                    | 676-690                | N679K/P681H                   | TQTNSPRRARSVASQ        | TQTKSHRRARSVASQ        |
| Spike   | SP_137                    | 681-695                | P681H                         | PRRARSVASQSIAY         | HRRARSVASQSIAY         |
| Spike   | SP_140                    | 696-710                | A701V                         | TMSLGAENSVAYSNN        | TMSLGVENSVAYSNN        |
| Spike   | SP_141                    | 701-715                | A701V                         | AENSVAYSNNSIAIP        | VENSVAYSNNSIAIP        |
| Spike   | SP_151                    | 751-765                | N764K                         | NLLQYGSFCTQLNR         | NLLQYGSFCTQLKR         |
| Spike   | SP_152                    | 756-770                | N764K                         | YGSFCTQLNRALTGI        | YGSFCTQLKRALTGI        |
| Spike   | SP_153                    | 761-775                | N764K                         | TQLNRALTGIAVEQD        | TQLKRALTGIAVEQD        |
| Spike   | SP_158                    | 786-800                | D796Y                         | KQIYKTPPIKDFGGF        | KQIYKTPPIKYFGGF        |
| Spike   | SP_159                    | 791-805                | D796Y                         | TPPIKDFGGFNFSQI        | TPPIKYFGGFNFSQI        |
| Spike   | SP_160                    | 796-810                | D796Y                         | DFGGFNFSQILPDP         | YFGGFNFSQILPDP         |

|               |        |         |             |                                                                                       |                                                                                                                          |
|---------------|--------|---------|-------------|---------------------------------------------------------------------------------------|--------------------------------------------------------------------------------------------------------------------------|
| Spike         | SP_170 | 846-860 | N856K       | ARDLICAQKFNGLTV                                                                       | ARDLICAQKF <b>K</b> GLTV                                                                                                 |
| Spike         | SP_171 | 851-865 | N856K       | CAQKFNGLTVLPPLL                                                                       | CAQKF <b>K</b> GLTVLPPLL                                                                                                 |
| Spike         | SP_172 | 856-870 | N856K       | NGLTVLPPLLTDEMI                                                                       | <b>K</b> GLTVLPPLLTDEMI                                                                                                  |
| Spike         | SP_189 | 941-955 | Q954H       | TASALGKLQDVVNQN                                                                       | TASALGKLQDVVN <b>H</b> N                                                                                                 |
| Spike         | SP_190 | 946-960 | Q954H       | GKLQDVVNQNAQALN                                                                       | GKLQDVVN <b>H</b> NAQALN                                                                                                 |
| Spike         | SP_191 | 951-965 | Q954H       | VVNQNAQALNTLVKQ                                                                       | VVN <b>H</b> NAQALNTLVKQ                                                                                                 |
| Spike         | SP_192 | 956-970 | N969K       | AQALNTLVKQLSSNF                                                                       | AQALNTLVKQL <b>S</b> KF                                                                                                  |
| Spike         | SP_193 | 961-975 | N969K       | TLVKQLSSNFGAISS                                                                       | TLVKQL <b>S</b> KFGAISS                                                                                                  |
| Spike         | SP_194 | 966-980 | N969K       | LSSNFGAISSVLNDI                                                                       | L <b>S</b> S <b>K</b> FGAISSVLNDI                                                                                        |
| Spike         | SP_195 | 971-985 | L981F       | GAISSVLNDILSRLD                                                                       | GAISSVLNDI <b>F</b> SRLD                                                                                                 |
| Spike         | SP_196 | 976-990 | L981F       | VLNDILSRLDKVEAE                                                                       | VLNDI <b>F</b> SRLDKVEAE                                                                                                 |
| Spike         | SP_197 | 981-995 | L981F       | LSRLDKVEAEVQIDR                                                                       | <b>F</b> SRLDKVEAEVQIDR                                                                                                  |
| Membrane      | M1     | 1-15    | D3G         | MADSNGTITVEELK                                                                        | MAG <b>S</b> NGTITVEELK                                                                                                  |
| Membrane      | M2     | 6-20    | Q19E        | GTITVEELKLE                                                                           | GTITVEELKLE <b>Q</b> W <b>E</b> W                                                                                        |
| Membrane      | M3     | 11-25   | Q19E        | EELKLE                                                                                | Q <b>W</b> NLVIG <b>E</b> WNLVIG                                                                                         |
| Membrane      | M4     | 16-30   | Q19E        | LLE                                                                                   | Q <b>W</b> NLVIGFLFT <b>E</b> WNLVIGFLFT                                                                                 |
| Membrane      | M11    | 51-65   | A63T        | LIFLWLLWPVTL                                                                          | A <b>C</b> F <b>T</b> C <b>F</b>                                                                                         |
| Membrane      | M12    | 56-70   | A63T        | LLWPVTL                                                                               | A <b>C</b> FVLA <b>A</b> V                                                                                               |
| Membrane      | M13    | 61-75   | A63T        | TL                                                                                    | A <b>C</b> FVLA <b>A</b> VYRIN <b>W</b>                                                                                  |
| Nucleoprotein | NP1    | 1-15    | P13L        | MSDNGPQNQRNAPRI                                                                       | MSDNGPQNQRN <b>A</b> LRI                                                                                                 |
| Nucleoprotein | NP2    | 6-20    | P13L        | PQNQRNAPRITFGGP                                                                       | PQNQRN <b>A</b> LRI <b>T</b> FGGP                                                                                        |
| Nucleoprotein | NP3    | 11-25   | P13L        | NAPRITFGGPSDSTG                                                                       | <b>N</b> A <b>L</b> RITFGGPSDSTG                                                                                         |
| Nucleoprotein | NP5    | 21-35   | DEL31-33    | SDSTGSNQNG                                                                            | <b>E</b> R <b>S</b> G <b>A</b> SDSTGSNQNG <b>G</b> A <b>R</b> S <b>K</b>                                                 |
| Nucleoprotein | NP6    | 26-40   | DEL31-33    | SNQNG                                                                                 | <b>E</b> R <b>S</b> G <b>A</b> R <b>S</b> K <b>Q</b> R SNQNG <b>G</b> A <b>R</b> S <b>K</b> Q <b>R</b> <b>P</b> <b>Q</b> |
| Nucleoprotein | NP7    | 31-45   | DEL31-33    | <b>E</b> R <b>S</b> G <b>A</b> R <b>S</b> K <b>Q</b> R <b>R</b> P <b>Q</b> G <b>L</b> | G <b>A</b> R <b>S</b> K <b>Q</b> R <b>R</b> P <b>Q</b> G <b>L</b> <b>P</b> <b>N</b> <b>N</b>                             |
| Nucleoprotein | NP39   | 191-205 | R203K/G204R | RNSSRNSTPGSS                                                                          | <b>R</b> G <b>T</b> RNSSRNSTPGSS <b>K</b> <b>R</b> <b>T</b>                                                              |
| Nucleoprotein | NP40   | 196-210 | R203K/G204R | NSTPGSS                                                                               | <b>R</b> G <b>T</b> SPARM NSTPGSS <b>K</b> <b>R</b> <b>T</b> SPARM                                                       |
| Nucleoprotein | NP41   | 201-215 | R203K/G204R | SS <b>R</b> G <b>T</b> SPARMAGNGG                                                     | <b>S</b> S <b>R</b> G <b>T</b> SPARMAGNGG                                                                                |
| Nucleoprotein | NP67   | 331-345 | D343G       | LTYTGAIKLDDKDPN                                                                       | LTYTGAIKLDD <b>K</b> <b>G</b> <b>P</b> <b>N</b>                                                                          |
| Nucleoprotein | NP68   | 336-350 | D343G       | AIKLDDKDPNFKDQV                                                                       | AIKLDD <b>K</b> <b>G</b> <b>P</b> <b>N</b> FKDQV                                                                         |
| Nucleoprotein | NP69   | 341-355 | D343G       | DKDPNFKDQVILLNK                                                                       | <b>D</b> <b>K</b> <b>G</b> <b>P</b> <b>N</b> FKDQVILLNK                                                                  |
